# Supplementary material for: Interplay of YEATS2 and GCDH regulates histone crotonylation and drives EMT in head and neck cancer
Source: eLife journal article supplement (doi:10.7554/elife.103321), 2025-02-20
Supplement: fig1-data1 [file elife-103321-fig1-data1-v1.zip]

Figure 1G

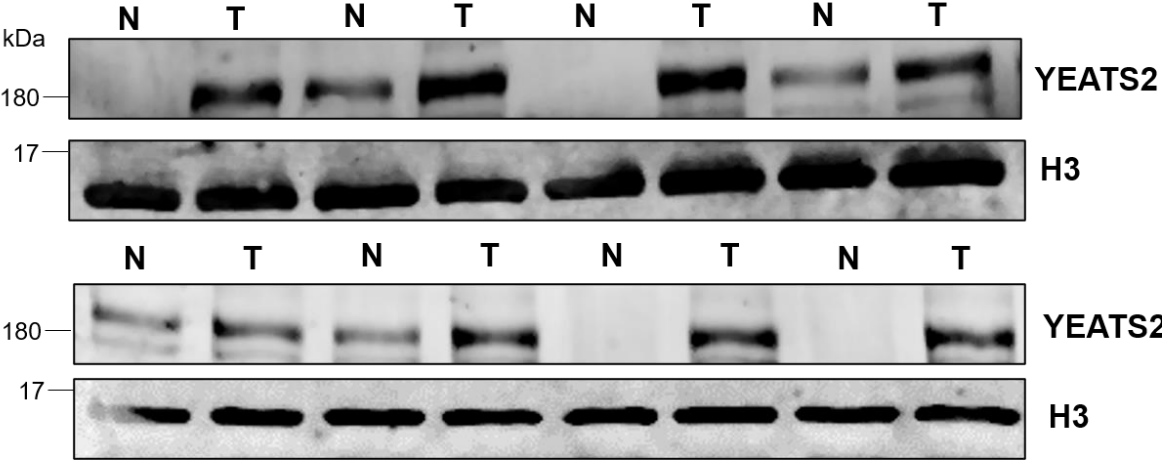

YEATS2

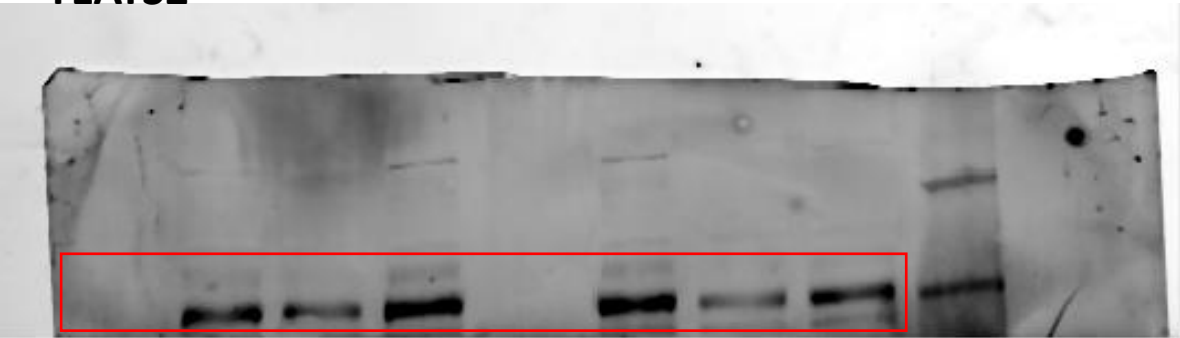

H3

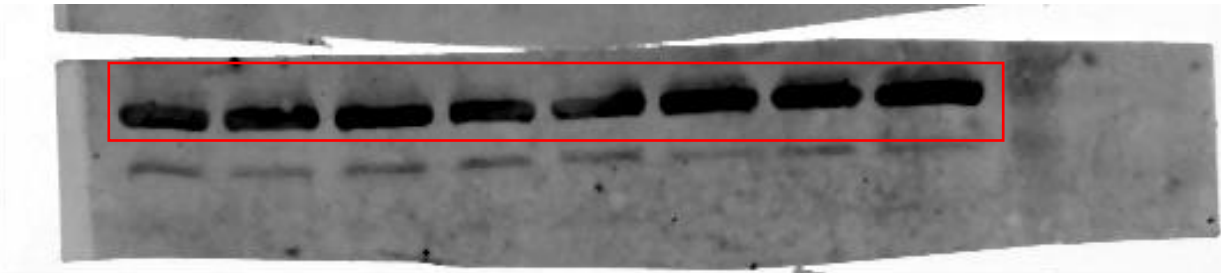

YEATS2

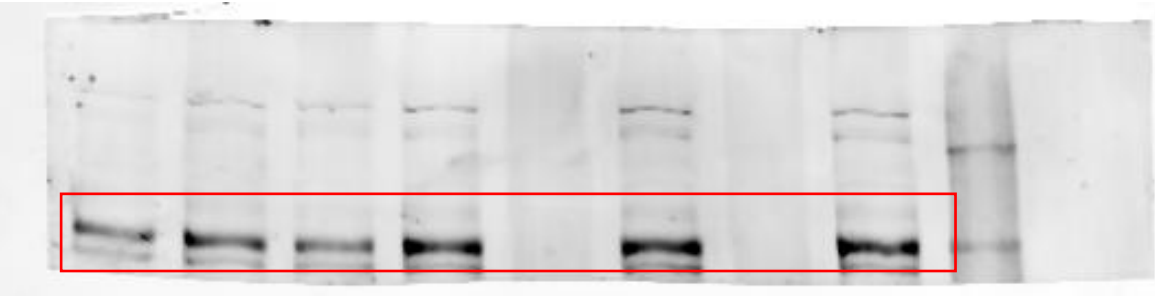

H3

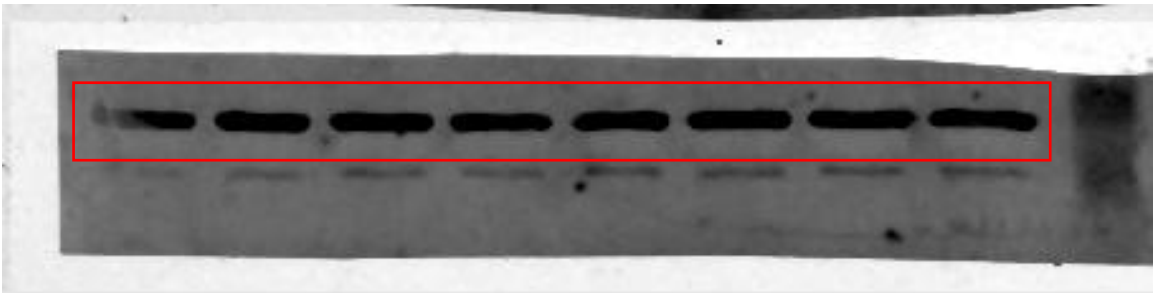

Figure 1—Source Data 1. PDF file containing original western blots for Figure 1G, indicating the relevant bands.
