# Supplementary material for: Interplay of YEATS2 and GCDH regulates histone crotonylation and drives EMT in head and neck cancer
Source: eLife journal article supplement (doi:10.7554/elife.103321), 2025-02-20
Supplement: fig2-data1 [file elife-103321-fig2-data1-v1.zip]

**Figure 2A**

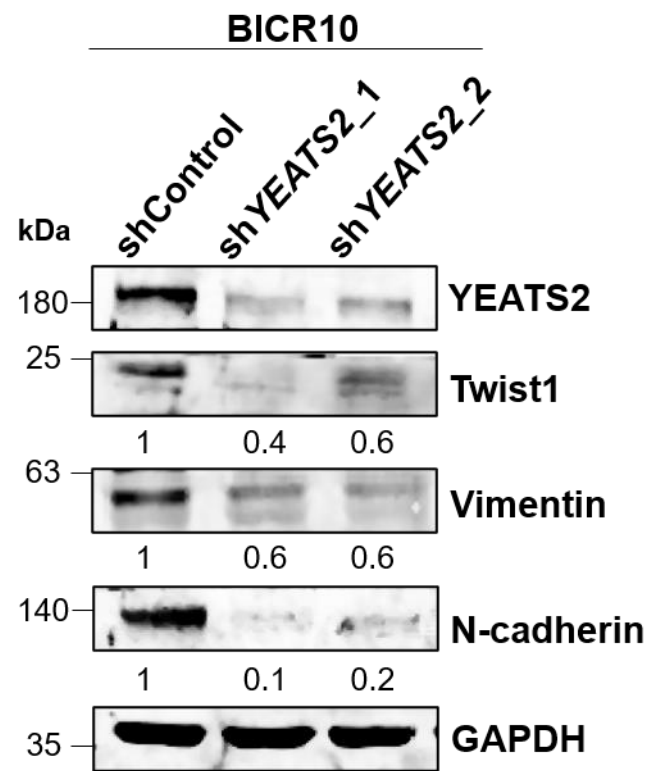

**YEATS2**

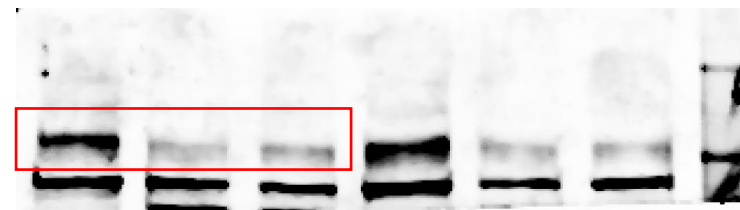

**Twist1**

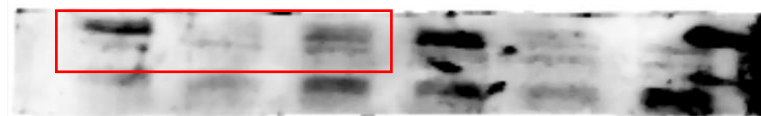

**Vimentin**

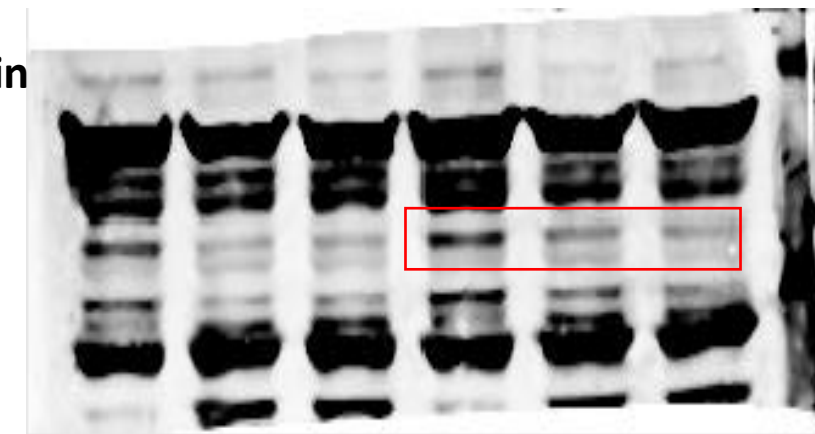

**N-Cadherin**

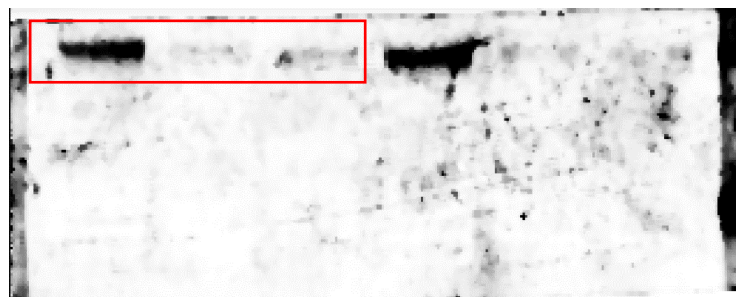

**GAPDH**

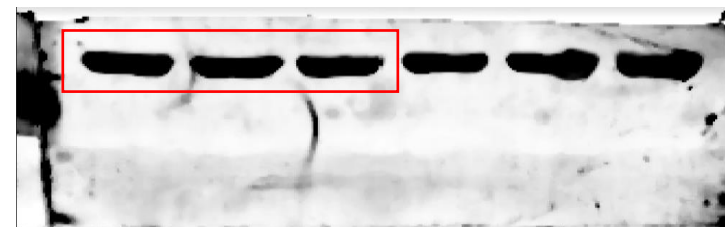

**Figure 2—Source Data 1.** PDF file containing original western blots for Figure 2A, indicating the relevant bands.
