# Supplementary material for: Interplay of YEATS2 and GCDH regulates histone crotonylation and drives EMT in head and neck cancer
Source: eLife journal article supplement (doi:10.7554/elife.103321), 2025-02-20
Supplement: fig2-figsupp1-data1 [file elife-103321-fig2-figsupp1-data1-v1.zip]

Figure 2- Figure Supplement 1A

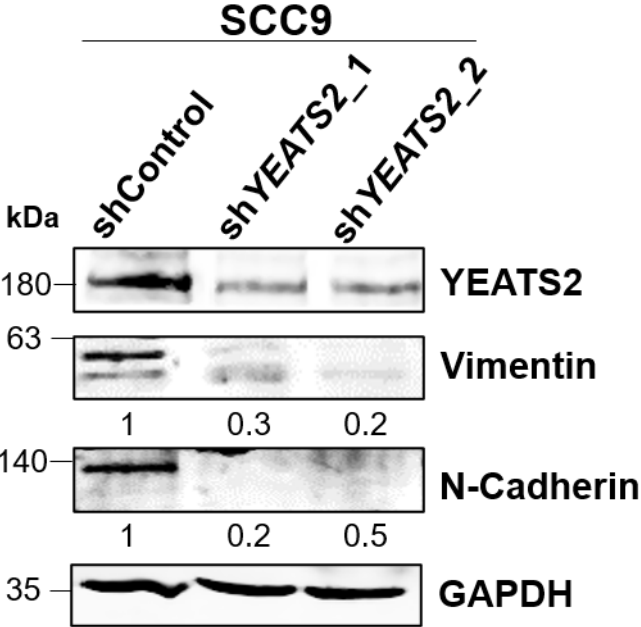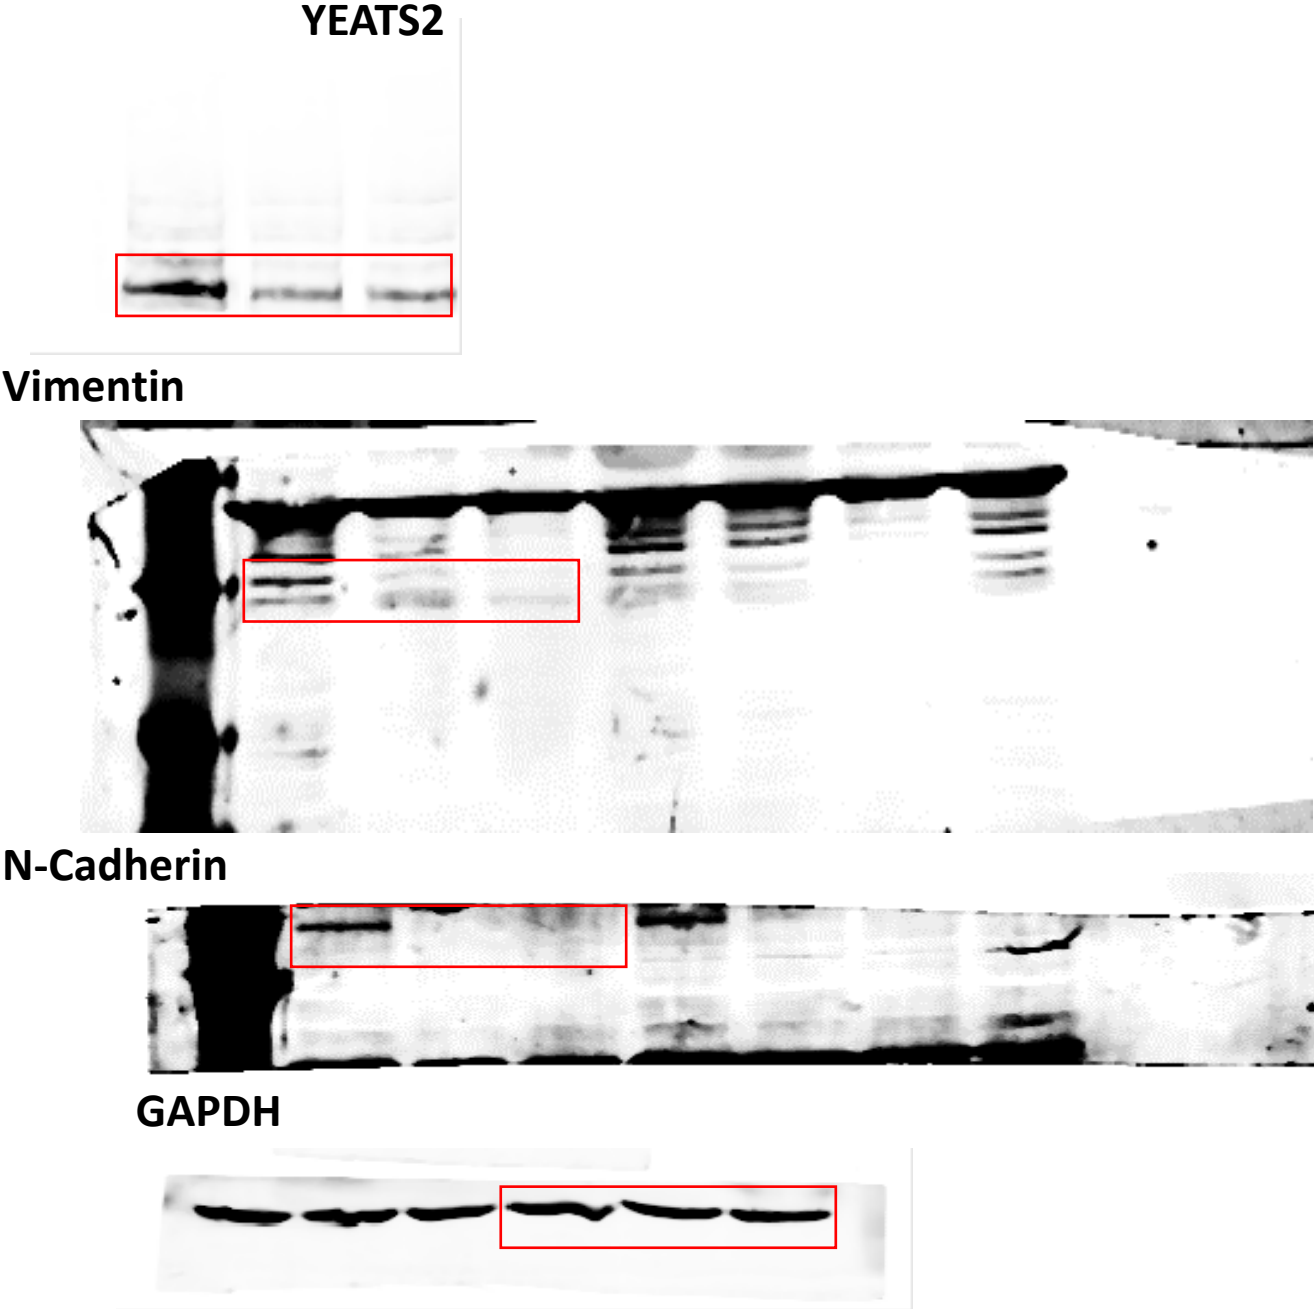



Figure 2- Figure Supplement 1C

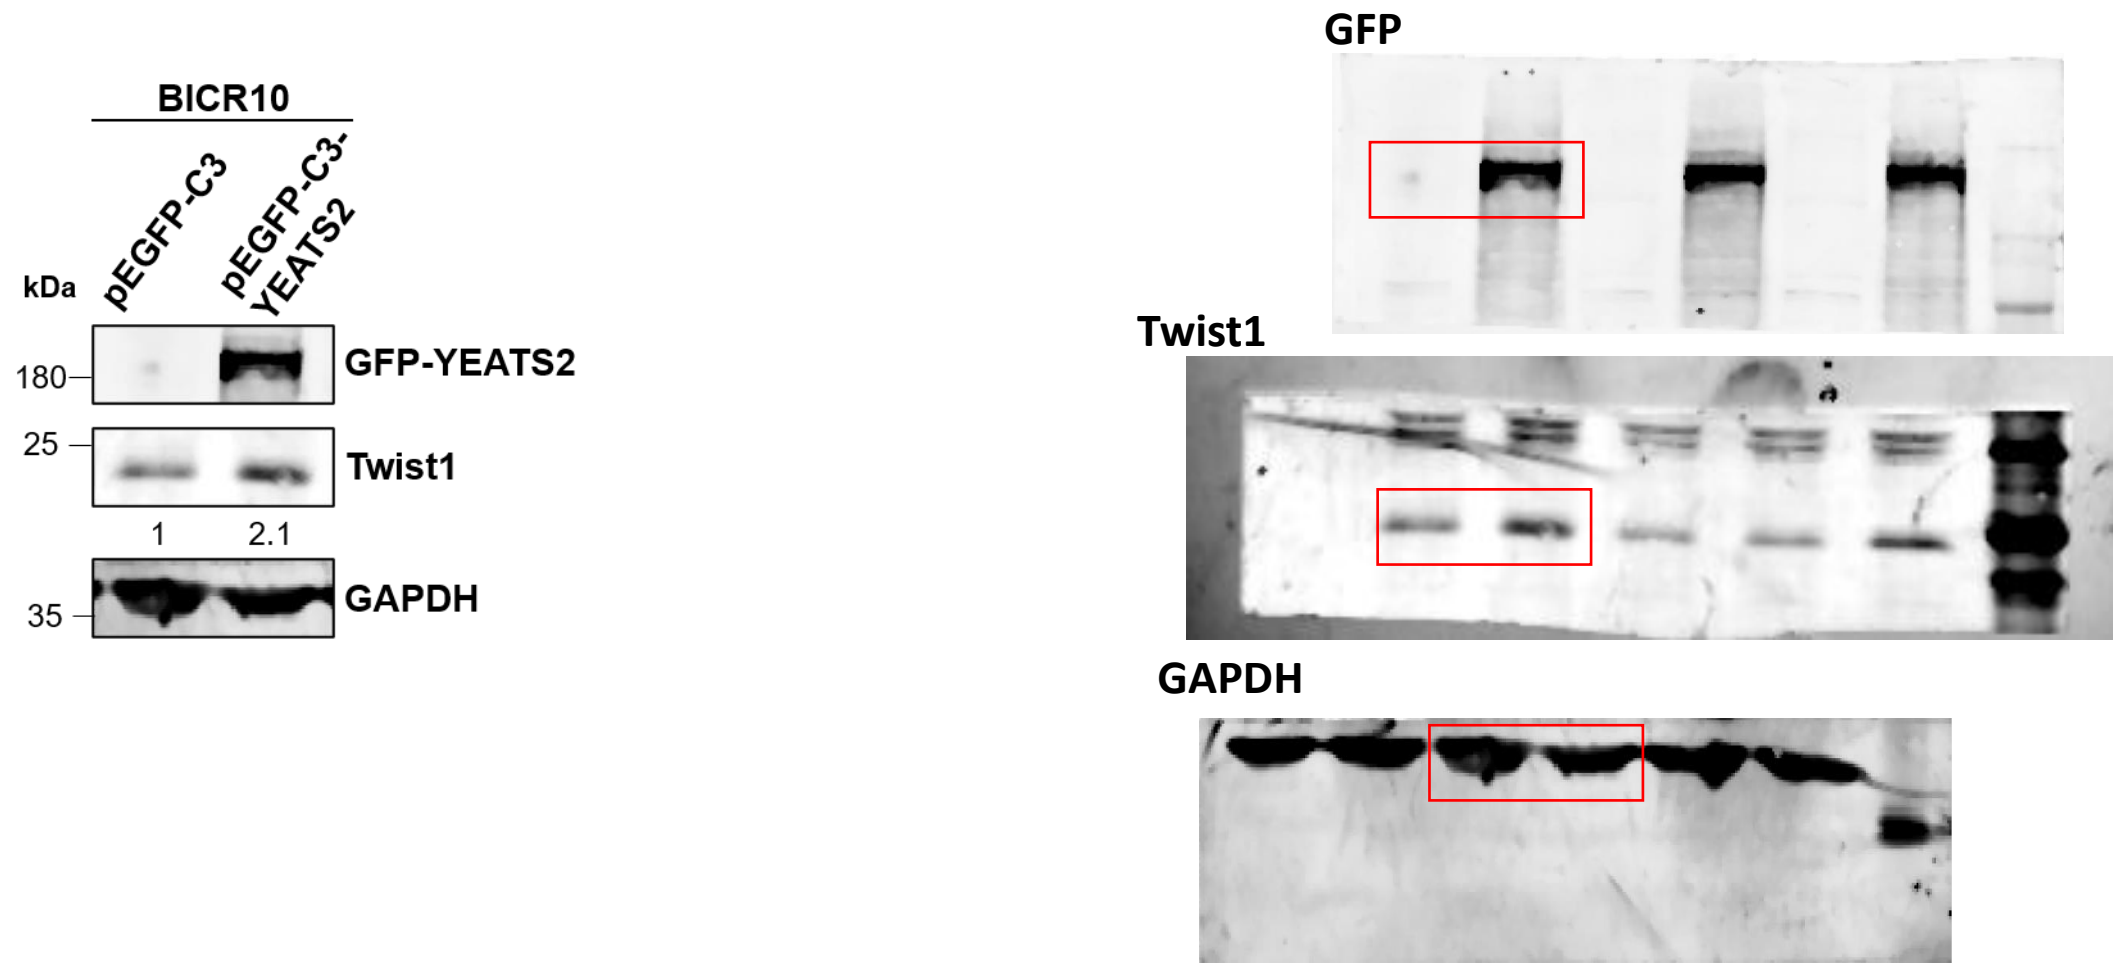

**Figure 2—figure supplement 1—Source Data 1.** PDF file containing original western blots for Figure 2—figure supplement 1A and 1C, indicating the relevant bands.
