# Supplementary material for: Interplay of YEATS2 and GCDH regulates histone crotonylation and drives EMT in head and neck cancer
Source: eLife journal article supplement (doi:10.7554/elife.103321), 2025-02-20
Supplement: fig3-figsupp1-data1 [file elife-103321-fig3-figsupp1-data1-v1.zip]

Figure 3- Figure Supplement 1E

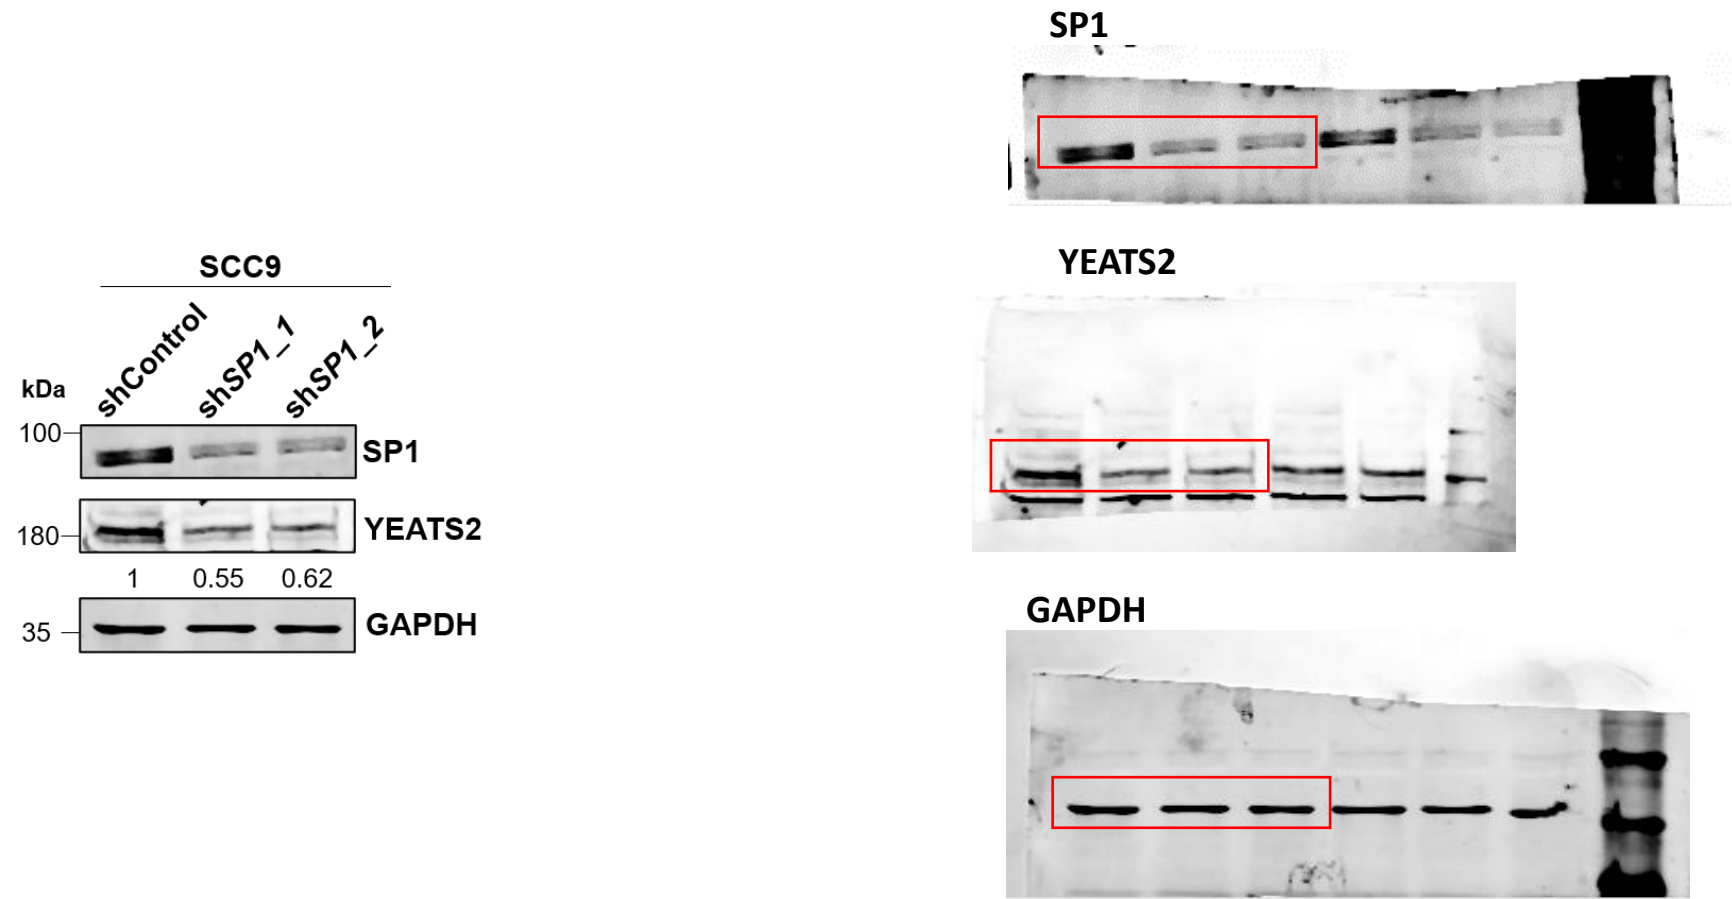

**Figure 3—figure supplement 1—Source Data 1.** PDF file containing original western blots for Figure 3—figure supplement 1E, indicating the relevant bands.
