# Supplementary material for: Interplay of YEATS2 and GCDH regulates histone crotonylation and drives EMT in head and neck cancer
Source: eLife journal article supplement (doi:10.7554/elife.103321), 2025-02-20
Supplement: fig4-data1 [file elife-103321-fig4-data1-v1.zip]

Figure 4D

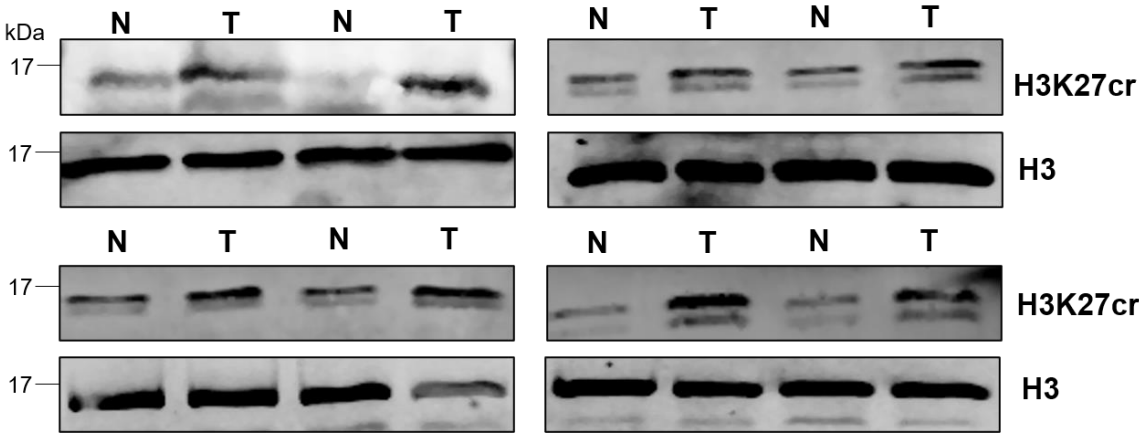

H3K27cr

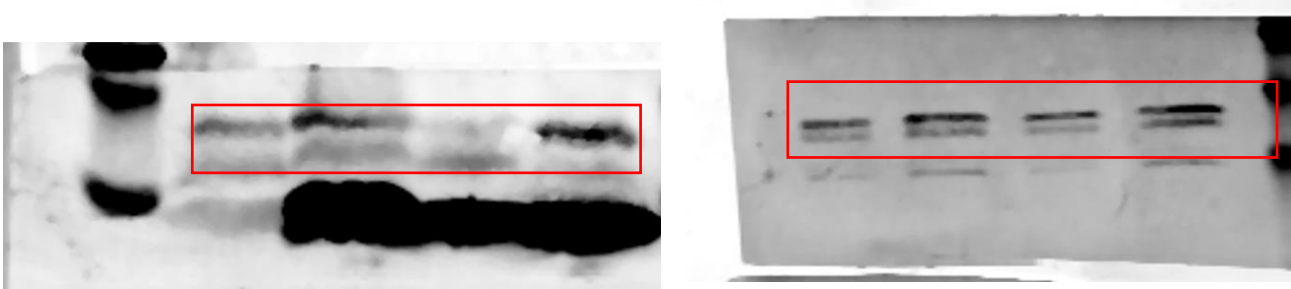

H3

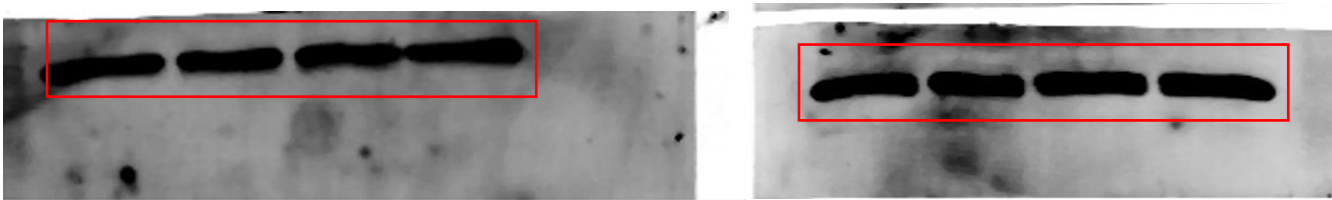

H3K27cr

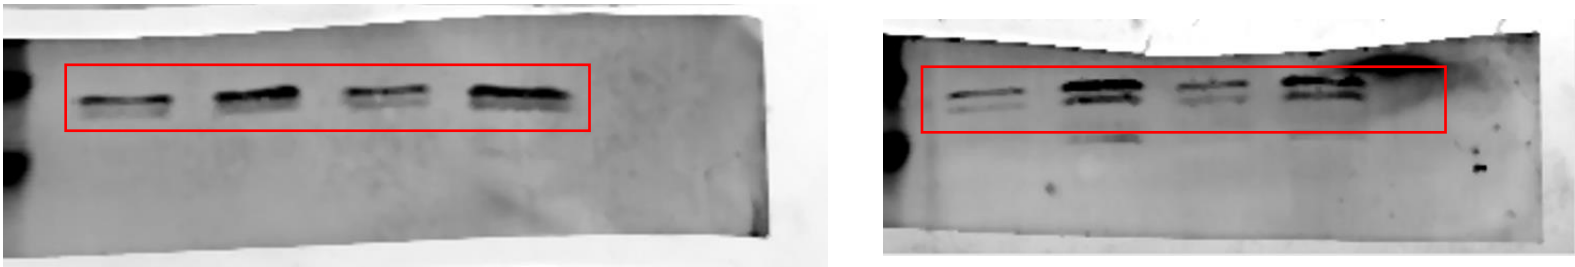

H3

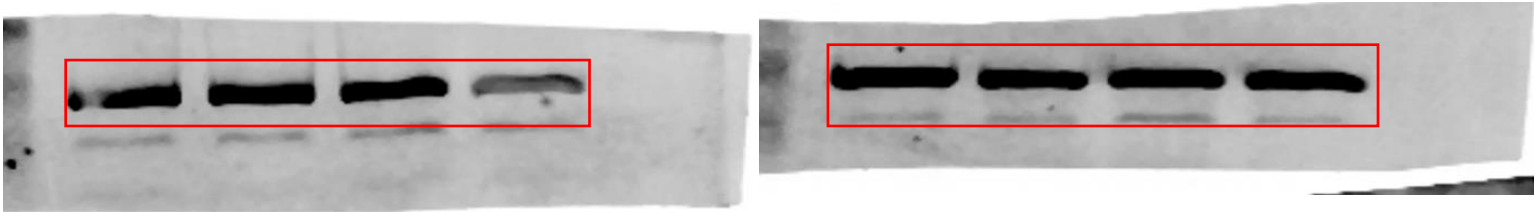

Figure 4G

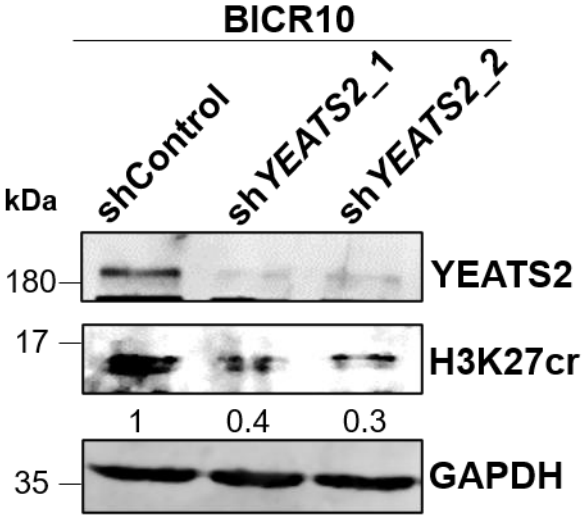

**YEATS2**

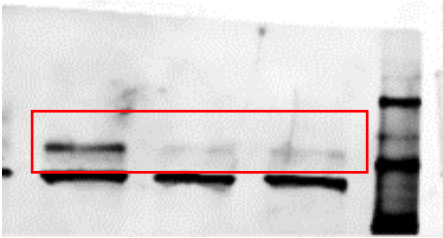

**H3K27cr**

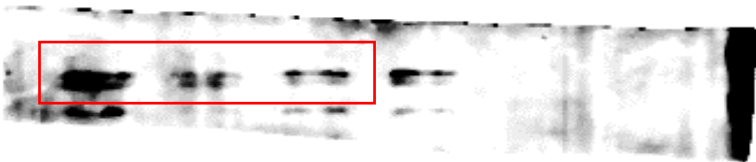

**GAPDH**

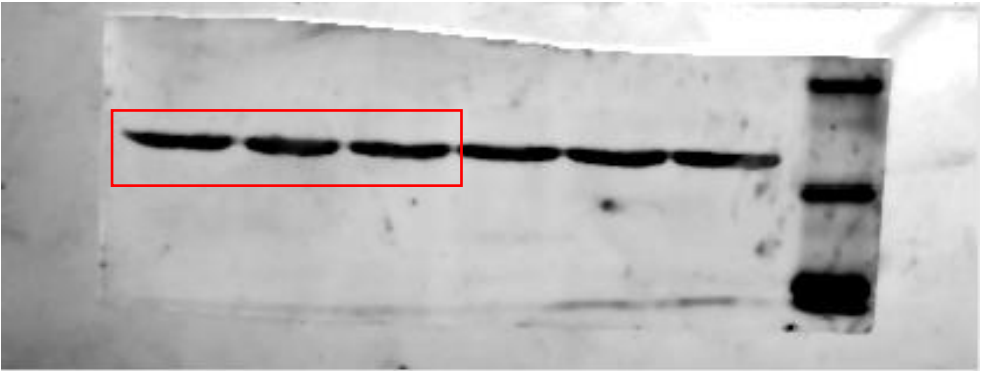

**Figure 4H**

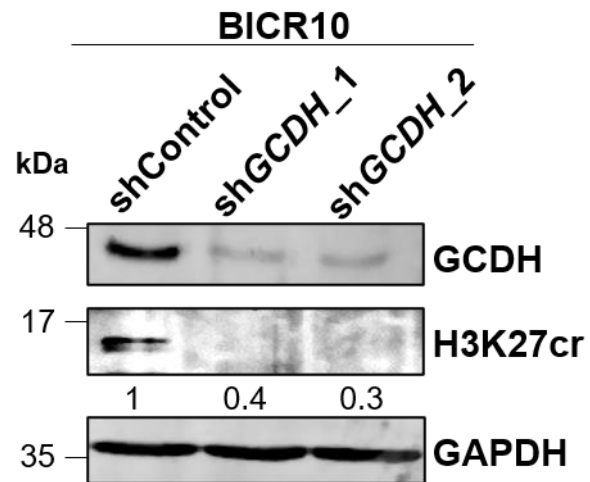

**GCDH**

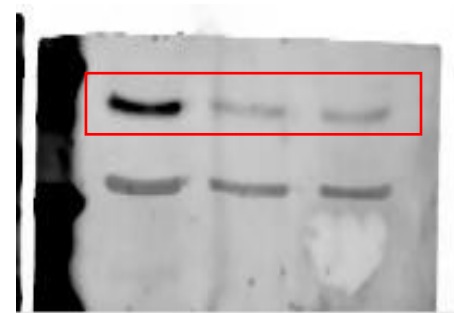

**H3K27cr**

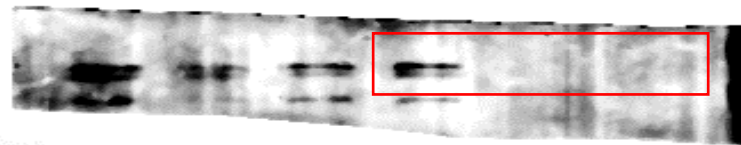

**GAPDH**

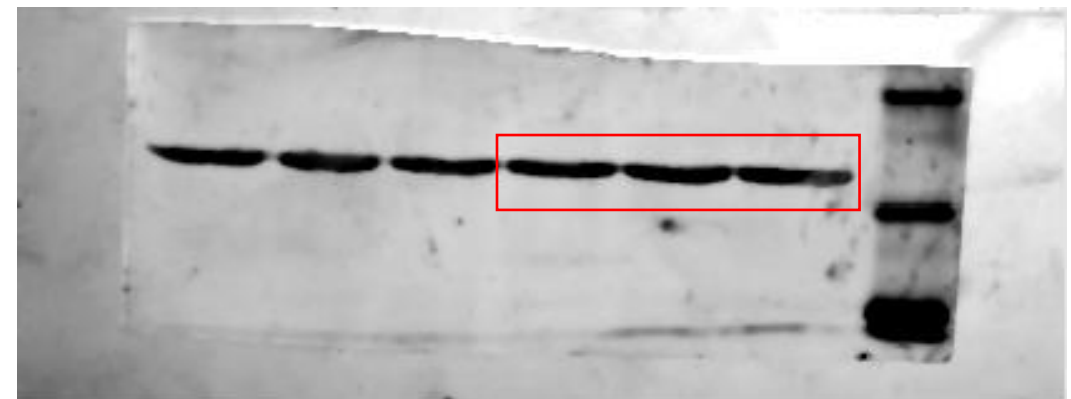

**Figure 4—Source Data 1.** PDF file containing original western blots for Figure 4D and 4G-H, indicating the relevant bands.
