# Supplementary material for: Interplay of YEATS2 and GCDH regulates histone crotonylation and drives EMT in head and neck cancer
Source: eLife journal article supplement (doi:10.7554/elife.103321), 2025-02-20
Supplement: fig4-figsupp4-data1 [file elife-103321-fig4-figsupp4-data1-v1.zip]

Figure 4- Figure Supplement 4A

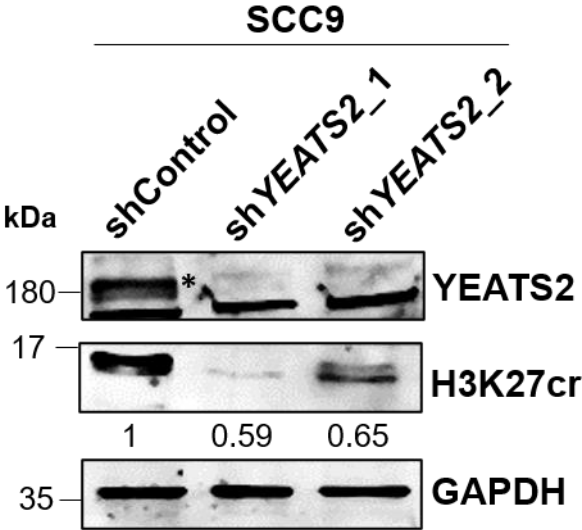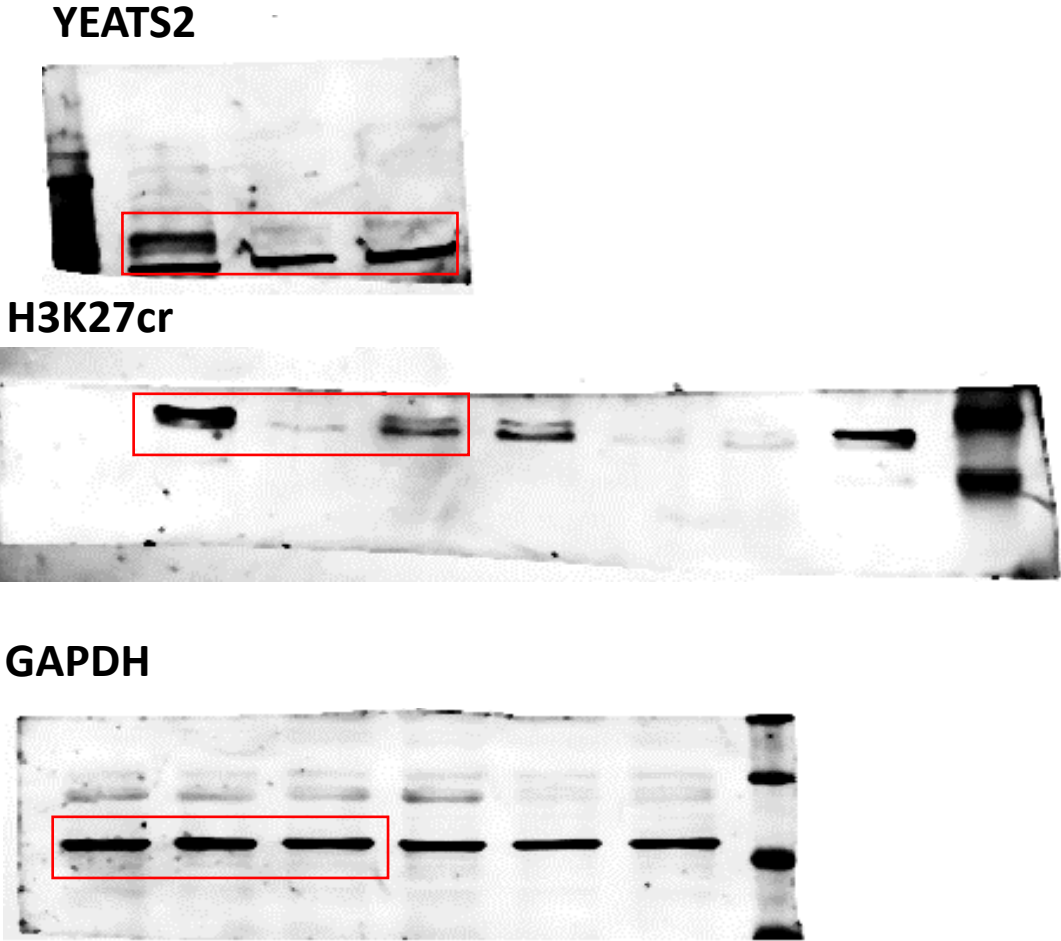

Figure 4- Figure Supplement 4B

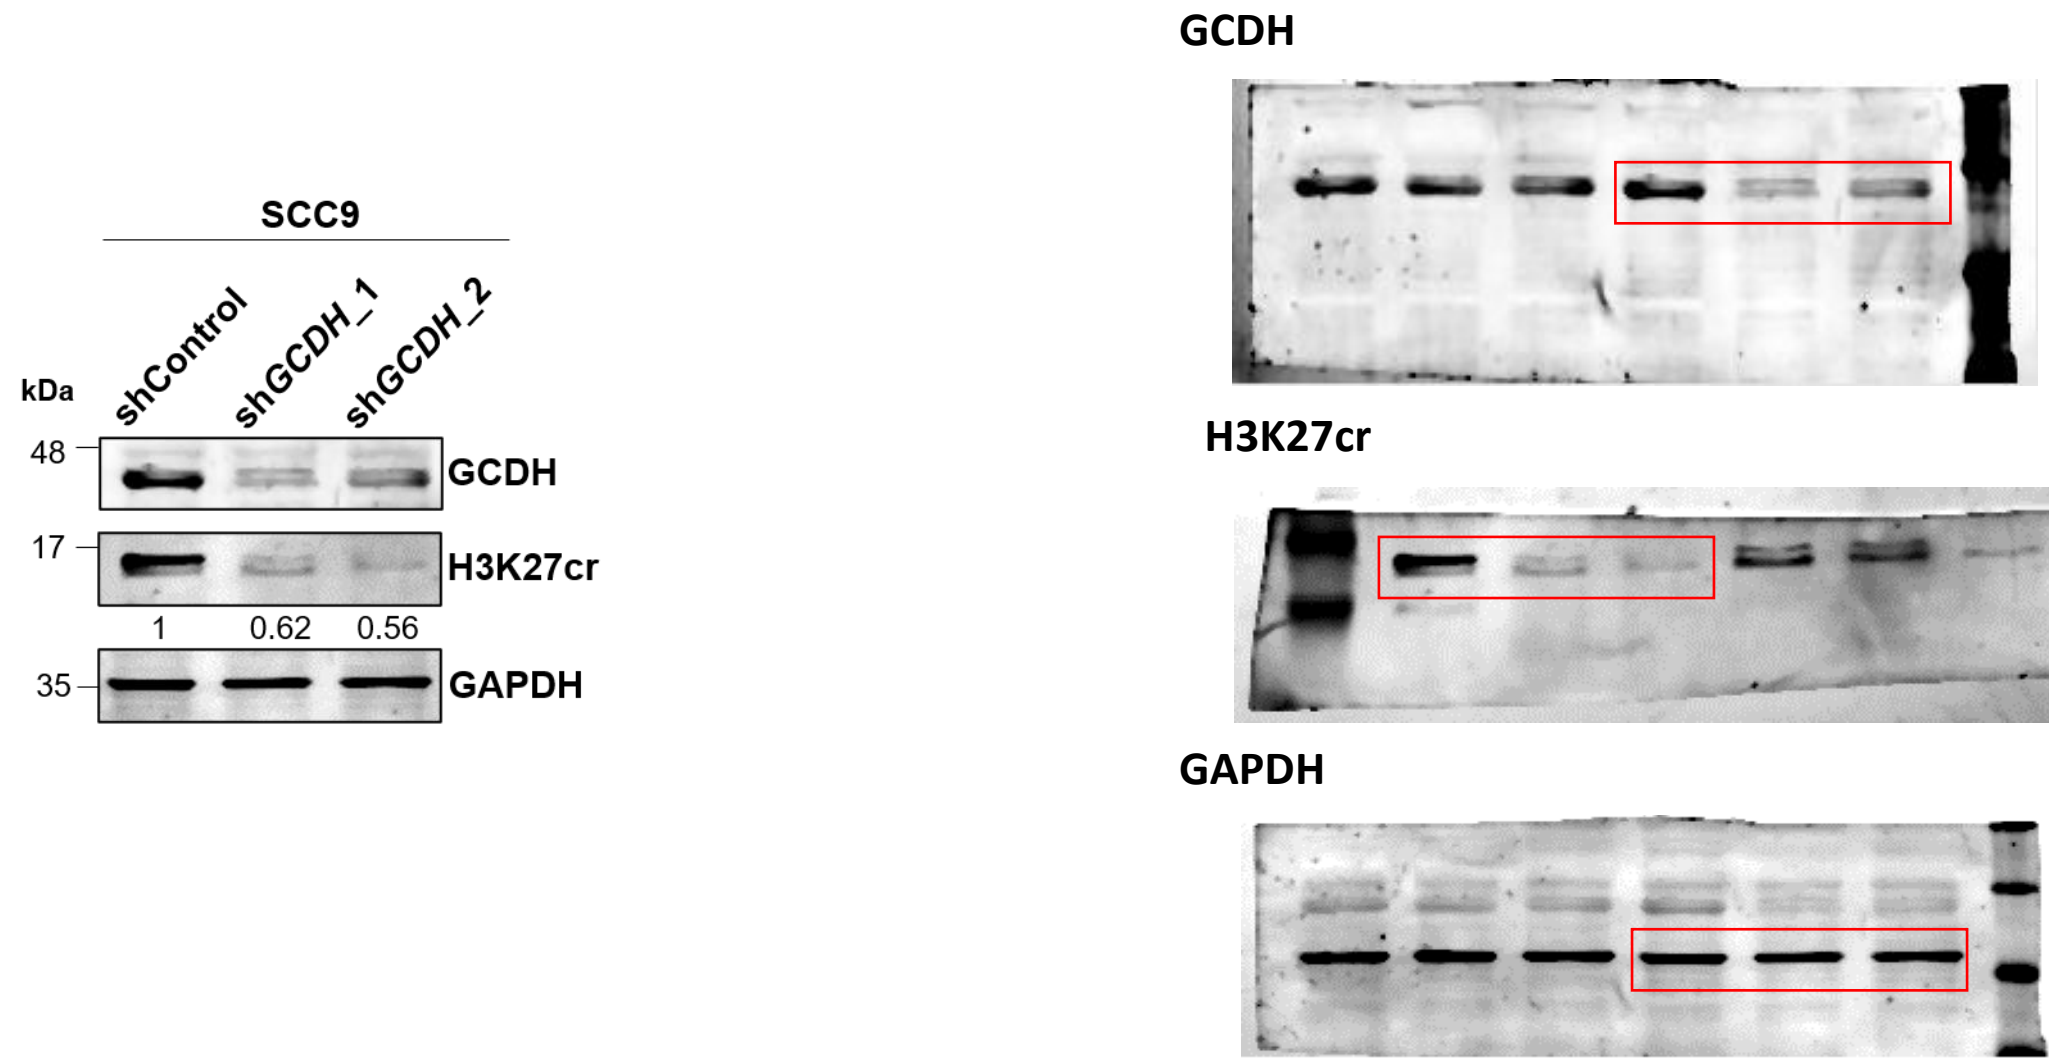

**Figure 4—figure supplement 4—Source Data 1.** PDF file containing original western blots for Figure 4—figure supplement 4A-B, indicating the relevant bands.
