# Supplementary material for: Interplay of YEATS2 and GCDH regulates histone crotonylation and drives EMT in head and neck cancer
Source: eLife journal article supplement (doi:10.7554/elife.103321), 2025-02-20
Supplement: fig5-data1 [file elife-103321-fig5-data1-v1.zip]

Figure 5E

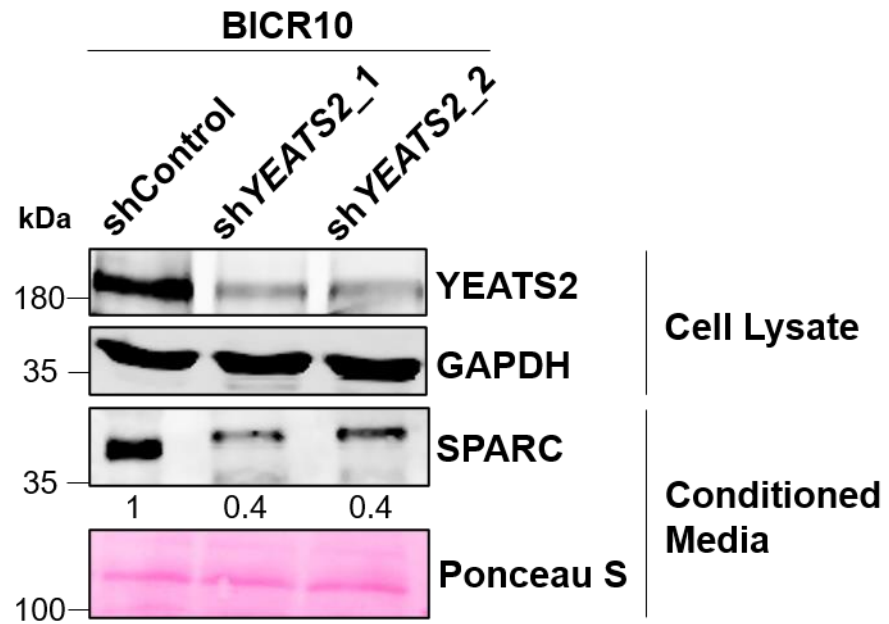

YEATS2

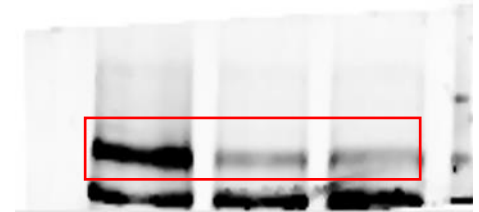

GAPDH

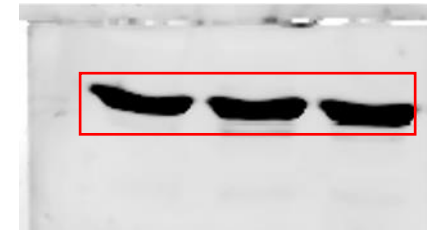

SPARC

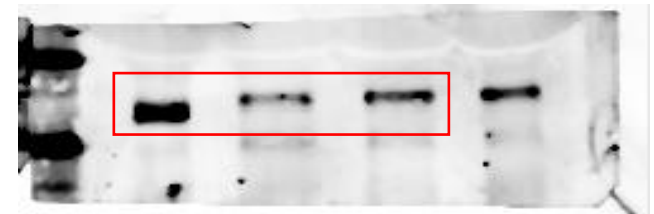

Ponceau S

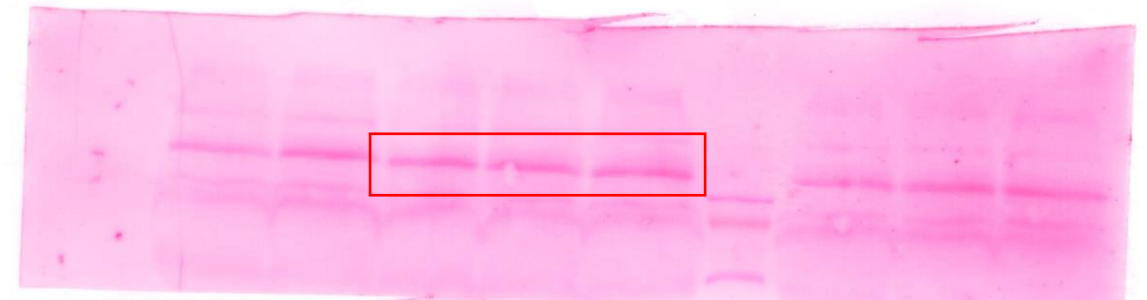

Figure 5G

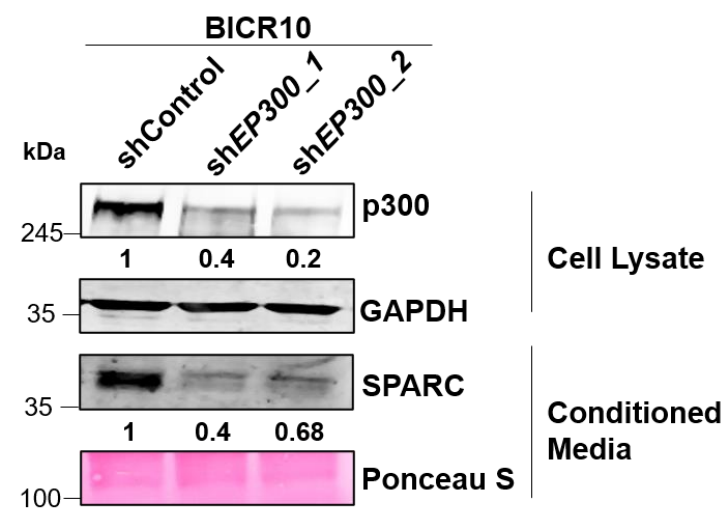

p300

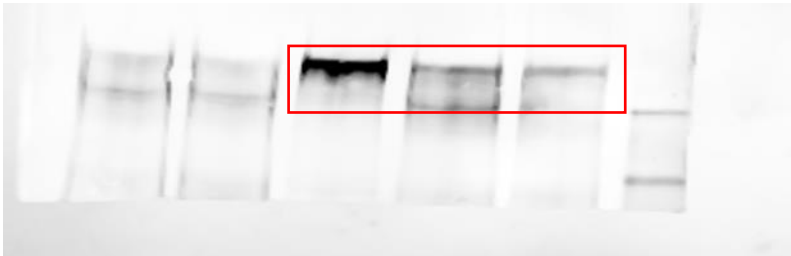

GAPDH

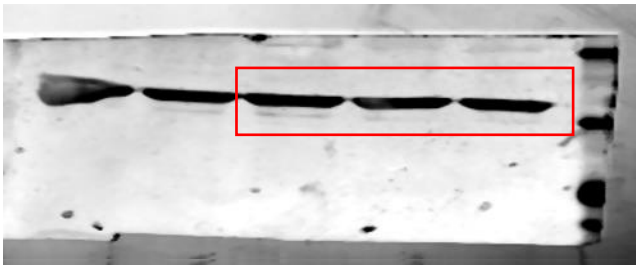

SPARC

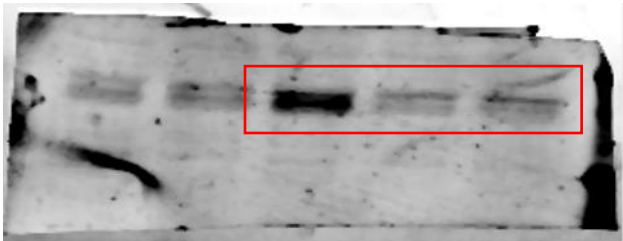

Ponceau S

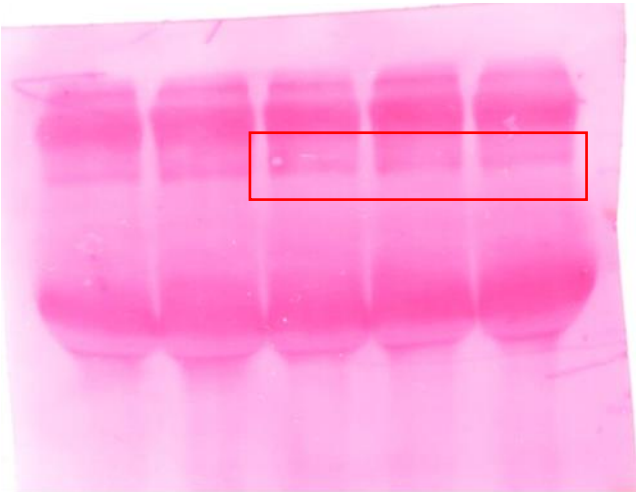

Figure 5H

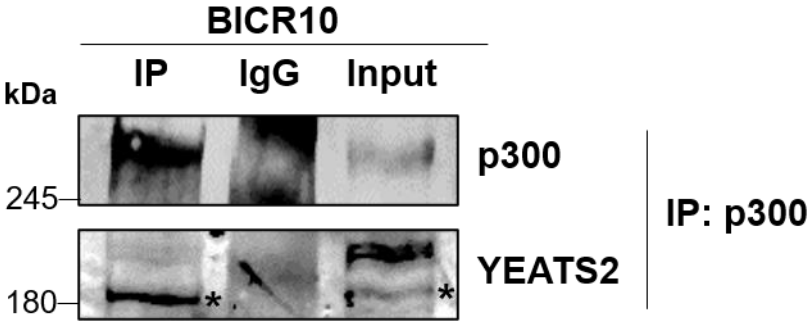

p300

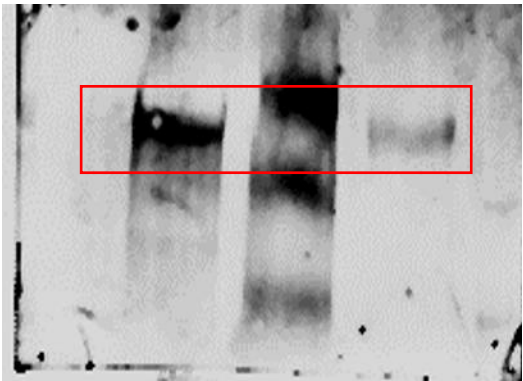

YEATS2

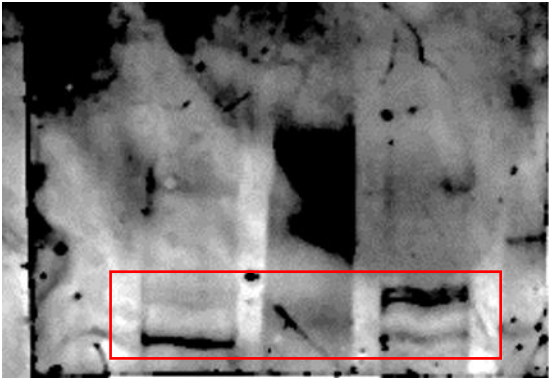

Figure 5I

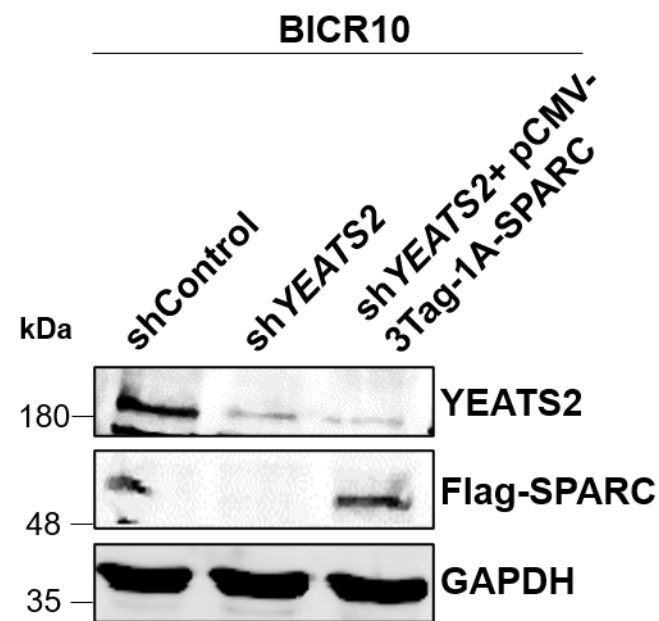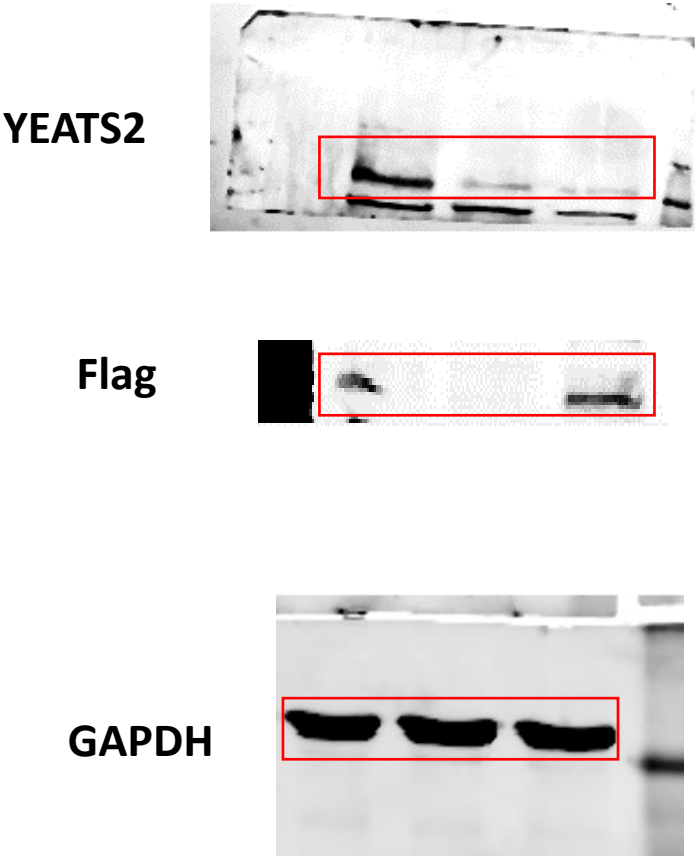

**Figure 5—Source Data 1.** PDF file containing original western blots for Figure 5E and 5G-I, indicating the relevant bands.
