# Supplementary material for: Interplay of YEATS2 and GCDH regulates histone crotonylation and drives EMT in head and neck cancer
Source: eLife journal article supplement (doi:10.7554/elife.103321), 2025-02-20
Supplement: fig6-data1 [file elife-103321-fig6-data1-v1.zip]

Figure 6F

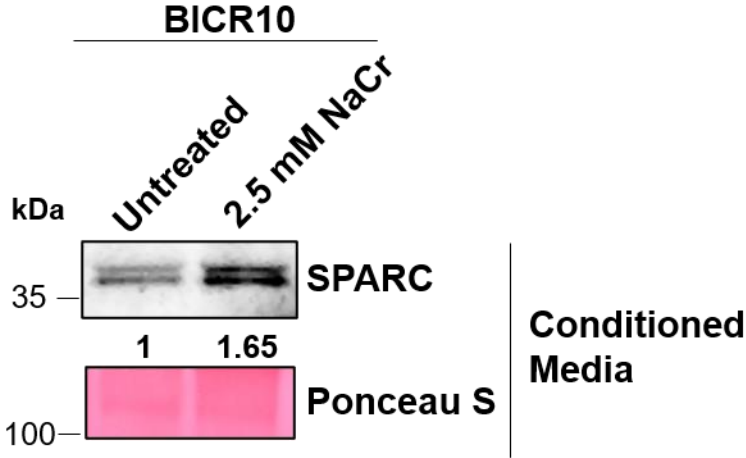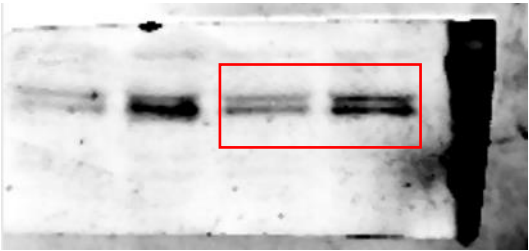

**SPARC**

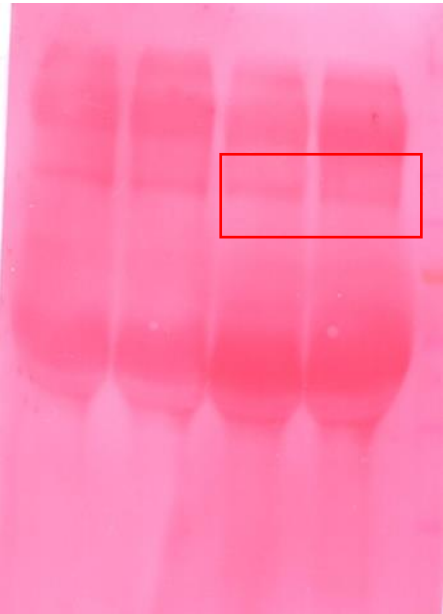

**Ponceau S**

Figure 6I

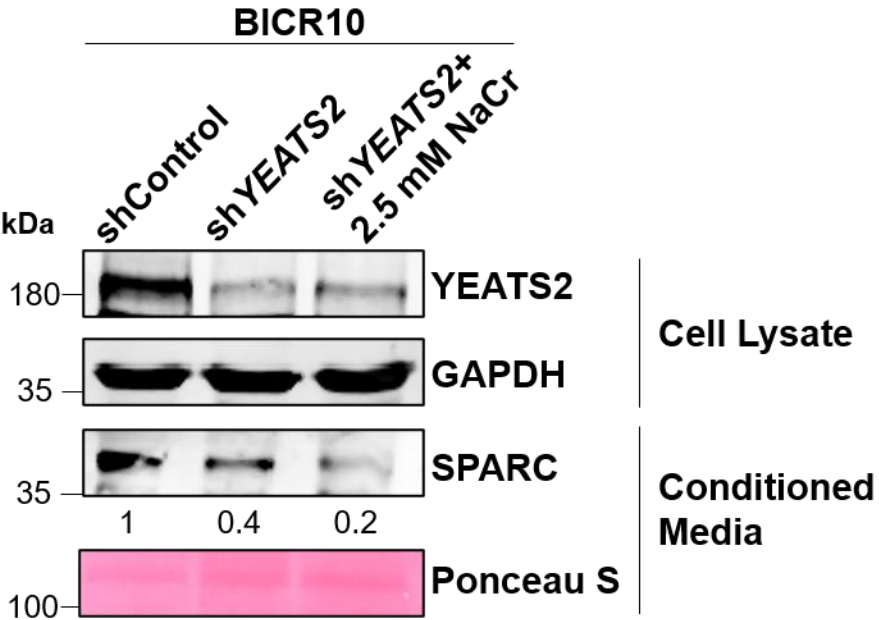

YEATS2

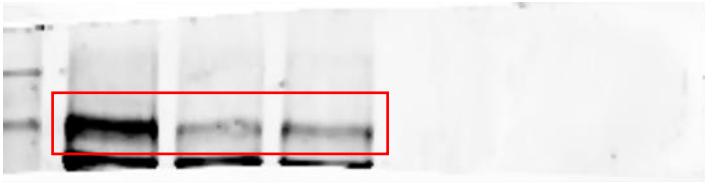

GAPDH

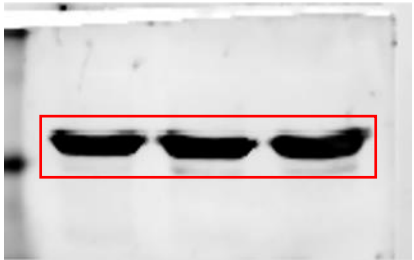

SPARC

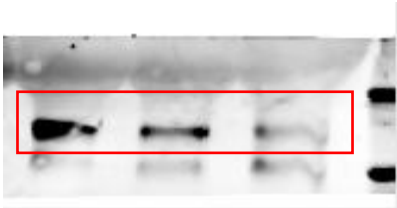

Ponceau S

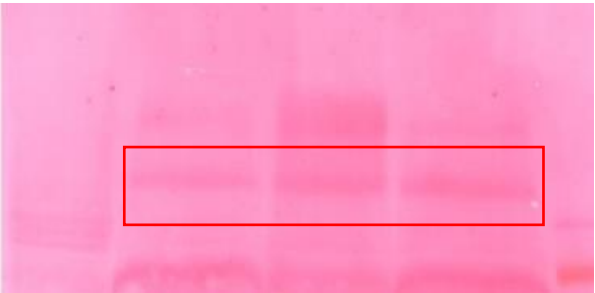

**Figure 6—Source Data 1.** PDF file containing original western blots for Figure 6F and 6I, indicating the relevant bands.
