# Supplementary material for: Interplay of YEATS2 and GCDH regulates histone crotonylation and drives EMT in head and neck cancer
Source: eLife journal article supplement (doi:10.7554/elife.103321), 2025-02-20
Supplement: fig7-data1 [file elife-103321-fig7-data1-v1.zip]

Figure 7B

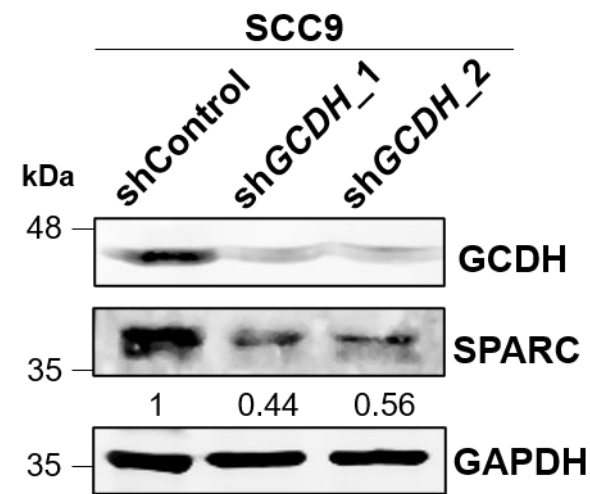

GCDH

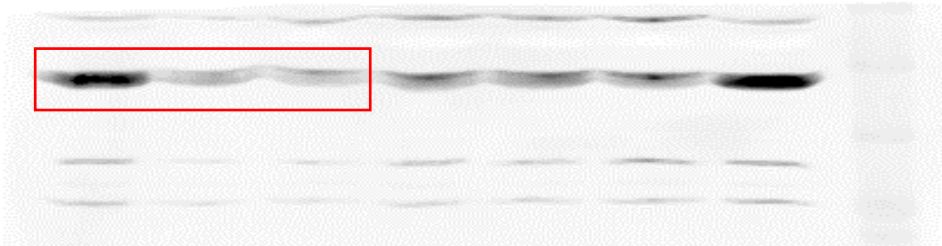

SPARC

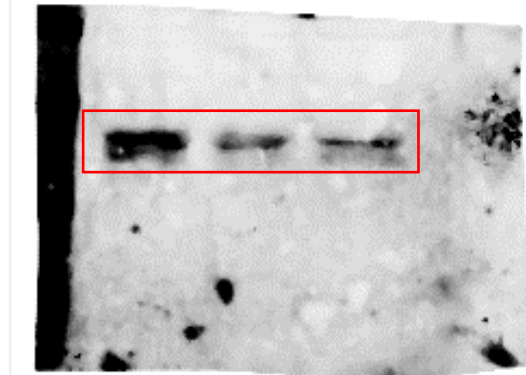

GAPDH

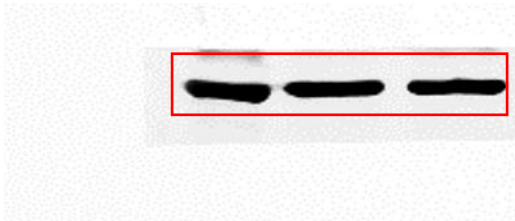

Figure 7D

SP1

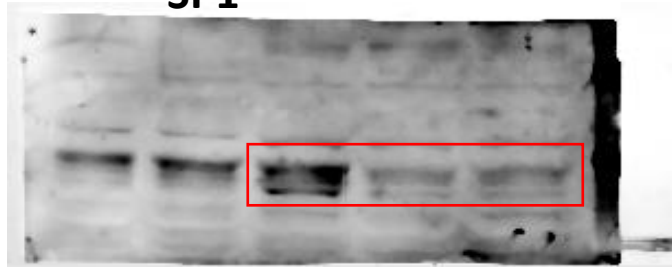

GCDH

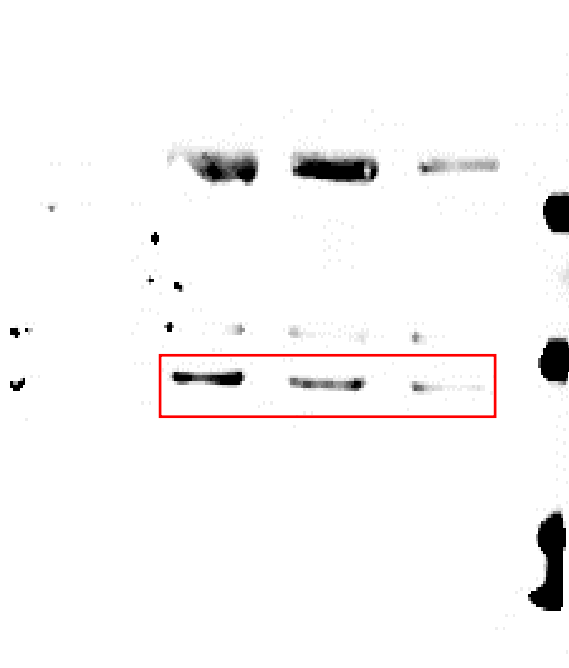

GAPDH

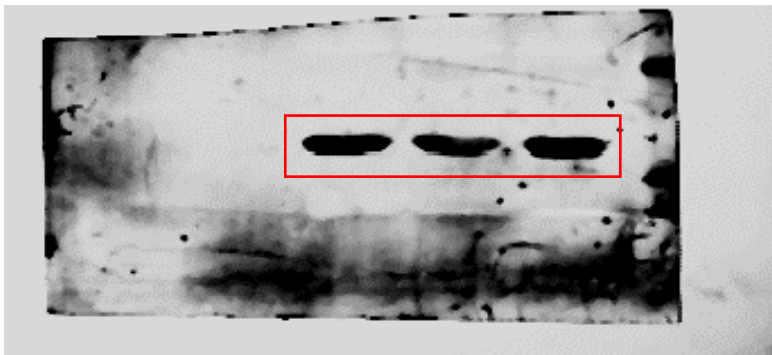

BICR10

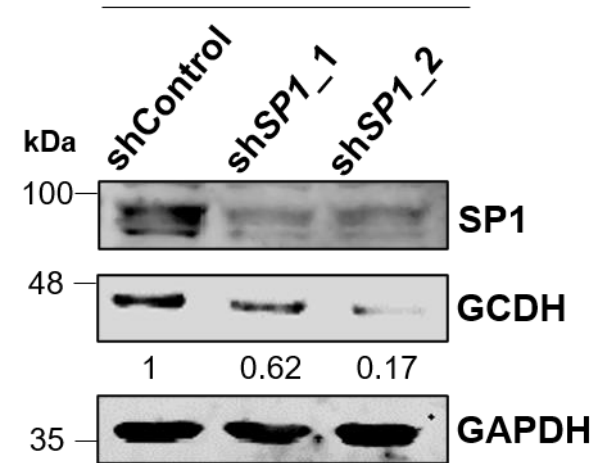

**Figure 7H**

BICR10

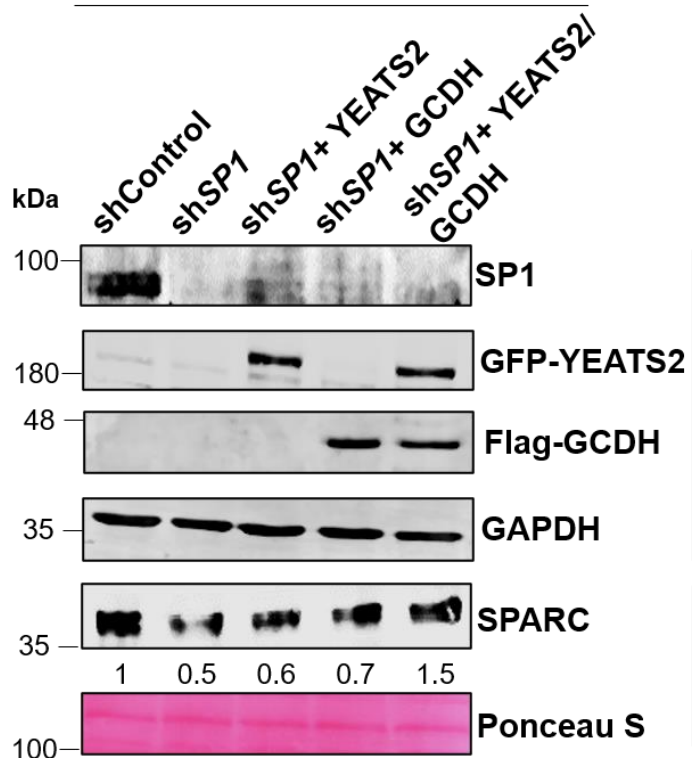

SP1

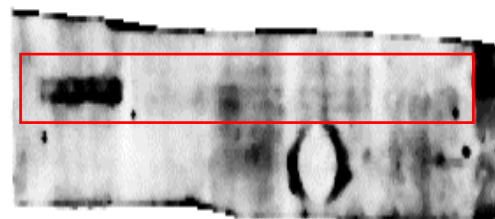

GFP

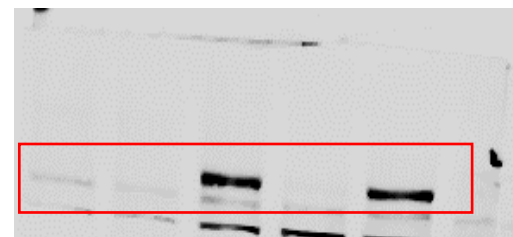

Cell Lysate

SPARC

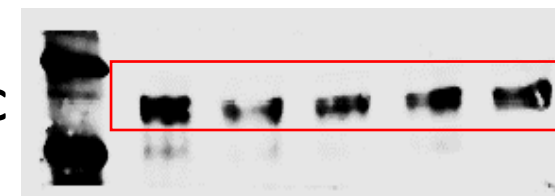

Ponceau S

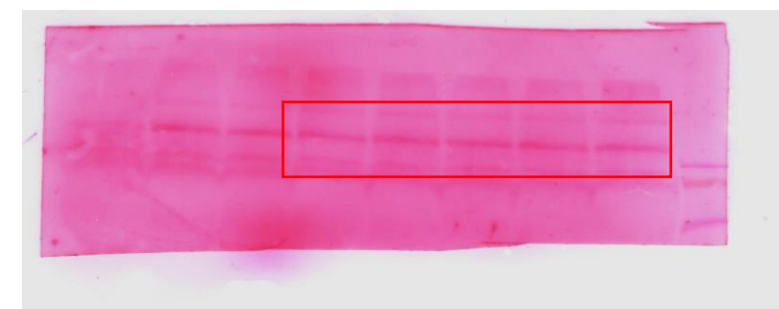

Conditioned Media

Flag

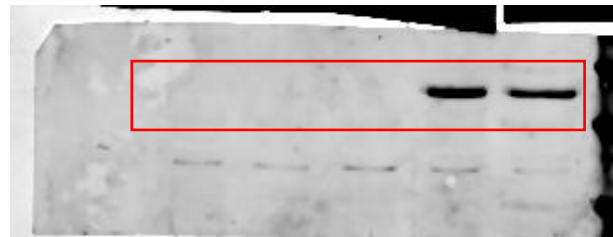

GAPDH

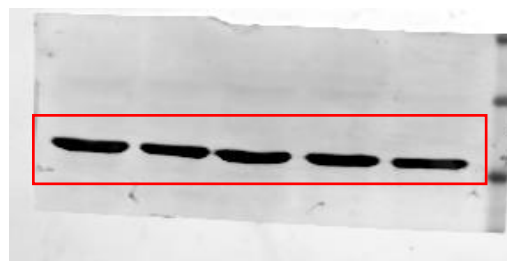

**Figure 7—Source Data 1.** PDF file containing original western blots for Figure 7B, 7D and 7H, indicating the relevant bands.
