# Supplementary material for: Interplay of YEATS2 and GCDH regulates histone crotonylation and drives EMT in head and neck cancer
Source: eLife. 2025 Aug 14;14:RP103321. doi: 10.7554/eLife.103321 (PMC12352869; doi:10.7554/eLife.103321)
Supplement: Figure 1—figure supplement 1—source data 3. [file elife-103321-fig1-figsupp1-data3.xlsx]

## Sheet: Supplement 1A
Normal	Tumor
0.70968	0.942309
0.45815	0.571634
0.97479	1.69739
0.998791	0.430028
2.32765	0.935552
0.775481	0.992454
1.09911	1.76326
0.656351	0.69087
Results of Statistical Analysis
Column B	Tumor
vs.	vs.
Column A	Normal
Unpaired t test
P value	0.9914
P value summary	ns
Significantly different (P < 0.05)?	No
One- or two-tailed P value?	Two-tailed
t, df	t=0.01099, df=14

## Sheet: Supplement 1B
Normal	Tumor
0.830124	1.09788
0.958099	1.75019
0.772843	0.785886
0.968473	0.848719
1.46905	0.430667
1.02339	1.72957
0.5211	1.11837
1.45692	1.12438
Results of Statistical Analysis
Column B	Tumor
vs.	vs.
Column A	Normal
Unpaired t test
P value	0.5828
P value summary	ns
Significantly different (P < 0.05)?	No
One- or two-tailed P value?	Two-tailed
t, df	t=0.5623, df=14
