# Supplementary material for: Interplay of YEATS2 and GCDH regulates histone crotonylation and drives EMT in head and neck cancer
Source: eLife. 2025 Aug 14;14:RP103321. doi: 10.7554/eLife.103321 (PMC12352869; doi:10.7554/eLife.103321)
Supplement: Figure 1—source data 3. [file elife-103321-fig1-data3.xlsx]

## Sheet: 1C
Normal	Tumor
1.28805	2.50331
1.31785	2.9309
0.831104	1.8498
0.581306	1.51333
0.996851	2.30892
1.65536	2.88257
0.943801	2.16551
0.385671	1.0736
Results of Statistical Analysis
Column B	Tumor
vs.	vs.
Column A	Normal
Unpaired t test
P value	0.0008
P value summary	***
Significantly different (P < 0.05)?	Yes
One- or two-tailed P value?	Two-tailed
t, df	t=4.238, df=14

## Sheet: 1E
Normal	Tumor
6.77	7.66		Results of Statistical Analysis
6.72	7.52		Column B	Tumor
6.69	7.45		vs.	vs.
6.78	6.43		Column A	Normal
6.21	8.3
6.67	7.41		Unpaired t test with Welch's correction
6.3	7.29		P value	<0.0001
6.33	7		P value summary	****
6.92	8.13		Significantly different (P < 0.05)?	Yes
6.96	7.85		One- or two-tailed P value?	Two-tailed
6.42	6.88		Welch-corrected t, df	t=15.53, df=142.4
6.87	7.26
6.64	7.42
6.46	7.78
6.5	7.56
6.38	8.1
6.88	8.88
6.83	7.4
6.25	7.67
6.8	8.33
6.54	7.05
6.19	7.47
6.53	7.3
6.79	8.07
6.97	7.66
6.77	6.28
6.83	7.3
6.25	7.36
6.84	7.31
6.27	8.95
6.58	7.23
7.02	7.37
6.4	7.75
7.13	7.4
6.98	7.17
6.45	6.77
6.53	7.19
6.46	8.09
7.06	7.29
6.57	7.83
6.53	7.19
6.7	7.32
7.01	7.52
6.35	7.54
6.32	6.58
	7.65
	7.54
	8.78
	7.41
	7.11
	7.79
	6.97
	7.37
	7.88
	6.96
	8.93
	7.3
	6.99
	8.02
	7.78
	8.14
	6.81
	6.92
	8.18
	8.2
	6.7
	7.23
	7.55
	7.35
	8.12
	7.61
	6.72
	7.93
	7.7
	7.53
	7.22
	7.73
	7.47
	7.21
	7.6
	6.71
	7.47
	7.84
	7.3
	7.8
	7.26
	7.07
	7.58
	7.3
	7.97
	6.97
	7.38
	7.95
	7.31
	7.67
	7.29
	7.16
	6.96
	7.87
	6.98
	7.6
	8
	7.52
	7.53
	6.9
	7.47
	7.8
	6.89
	6.8
	7.09
	7.4
	7.27
	7.99
	7.4
	7.25
	7.63
	7.65
	6.7
	7.74
	6.85
	8.83
	7.87
	8.96
	8.03
	7.37
	7.9
	7.88
	7.66
	8.43
	7.95
	7.99
	7.97
	7.16
	7.96
	8.11
	8.48
	8.72
	7.35
	7.4
	7.03
	7.89
	6.69
	7.1
	6.99
	7.01
	7.92
	7.69
	6.97
	7.52
	7.52
	7.57
	6.8
	7.28
	7.21
	8.11
	6.66
	7.7
	7.07
	7.2
	7.31
	7.12
	6.85
	7.01
	7.32
	6.87
	7.82
	6.89

## Sheet: 1F
Normal	Tumor
7.26	9.97		Results of Statistical Analysis
7.12	7.66		Column B	Tumor
7.41	8.76		vs.	vs.
7.98	7.82		Column A	Normal
6.81	6.63
7.34	8.16		Unpaired t test with Welch's correction
6.99	8.06		P value	0.0008
7.3	9.44		P value summary	***
7.57	8.1		Significantly different (P < 0.05)?	Yes
7.07	8.95		One- or two-tailed P value?	Two-tailed
7.37	7.38		Welch-corrected t, df	t=3.654, df=35.47
7.26	8.24
	7.65
	7.72
	7.57
	7.1
	8.15
	7.58
	7.19
	7.76
	7.64
	7.22
	8.26
	6.67
	8.12
	8.11

## Sheet: 1G
Normal	Tumor
0.694595	1.87006		Results of Statistical Analysis
0.732717	2.2317		Column B	Tumor
1.10868	1.93404		vs.	vs.
1.47833	1.35161		Column A	Normal
0.775413	0.983954
0.864733	1.25644		Unpaired t test
0.783265	0.864387		P value	<0.0001
0.03925	0.351047		P value summary	****
0.479643	0.50736		Significantly different (P < 0.05)?	Yes
0.33529	0.630267		One- or two-tailed P value?	Two-tailed
0.152094	0.678123		t, df	t=4.754, df=44
0.102843	0.597499
0.340806	0.781124
0.404133	1.19638
0.04219	0.657927
0.301643	0.571847
0.122399	1.35632
0.422402	2.27031
0.718513	1.11478
0.466299	1.11956
0.137227	1.32416
0.195975	0.892974
0.112502	1.23089
