# Supplementary material for: Interplay of YEATS2 and GCDH regulates histone crotonylation and drives EMT in head and neck cancer
Source: eLife. 2025 Aug 14;14:RP103321. doi: 10.7554/eLife.103321 (PMC12352869; doi:10.7554/eLife.103321)
Supplement: Figure 2—figure supplement 1—source data 3. [file elife-103321-fig2-figsupp1-data3.xlsx]

## Sheet: Supplement 1B
shControl	shYEATS2_1	shYEATS2_2
93.297	51.1398	47.8734
95.7468	45.934	43.3821
110.956	30.6227	23.4774
Results of Statistical Analysis
Column B	shYEATS2_1		Column C	shYEATS2_2
vs.	vs.		vs.	vs.
Column A	shControl		Column A	shControl
Unpaired t test			Unpaired t test
P value	0.0023		P value	0.0027
P value summary	**		P value summary	**
Significantly different (P < 0.05)?	Yes		Significantly different (P < 0.05)?	Yes
One- or two-tailed P value?	Two-tailed		One- or two-tailed P value?	Two-tailed
t, df	t=6.943, df=4		t, df	t=6.632, df=4

## Sheet: Supplement 1D
pEGFP-C3	pEGFP-C3-YEATS2
112.332	181.166
87.6682	197.309
Results of Statistical Analysis
Column B	pEGFP-C3-YEATS2
vs.	vs.
Column A	pEGFP-C3
Unpaired t test
P value	0.0262
P value summary	*
Significantly different (P < 0.05)?	Yes
One- or two-tailed P value?	Two-tailed
t, df	t=6.055, df=2

## Sheet: Supplement 1G
shControl	shYEATS2_1	shYEATS2_2
364	86	152.5
396.5	159.5	172.5
341	147.5	214
Results of Statistical Analysis
Column B	shYEATS2_1		Column C	shYEATS2_2
vs.	vs.		vs.	vs.
Column A	shControl		Column A	shControl
Unpaired t test			Unpaired t test
P value	0.0011		P value	0.0015
P value summary	**		P value summary	**
Significantly different (P < 0.05)?	Yes		Significantly different (P < 0.05)?	Yes
One- or two-tailed P value?	Two-tailed		One- or two-tailed P value?	Two-tailed
t, df	t=8.470, df=4		t, df	t=7.737, df=4

## Sheet: Supplement 1H
pEGFP-C3	pEGFP-C3-YEATS2
59	365
229	542.5
113.5	380.5
Results of Statistical Analysis
Column B	pEGFP-C3-YEATS2
vs.	vs.
Column A	pEGFP-C3
Unpaired t test
P value	0.0175
P value summary	*
Significantly different (P < 0.05)?	Yes
One- or two-tailed P value?	Two-tailed
t, df	t=3.903, df=4
