# Supplementary material for: Interplay of YEATS2 and GCDH regulates histone crotonylation and drives EMT in head and neck cancer
Source: eLife. 2025 Aug 14;14:RP103321. doi: 10.7554/eLife.103321 (PMC12352869; doi:10.7554/eLife.103321)
Supplement: Figure 2—source data 3. [file elife-103321-fig2-data3.xlsx]

## Sheet: 2B
shControl	shYEATS2_1	shYEATS2_2
101.018	56.5091	48.6546
94.2545	49.7454	44.7273
104.727	64.3636	46.4727
Results of Statistical Analysis
Column B	shYEATS2_1		Column C	shYEATS2_2
vs.	vs.		vs.	vs.
Column A	shControl		Column A	shControl
Unpaired t test			Unpaired t test
P value	0.0012		P value	<0.0001
P value summary	**		P value summary	****
Significantly different (P < 0.05)?	Yes		Significantly different (P < 0.05)?	Yes
One- or two-tailed P value?	Two-tailed		One- or two-tailed P value?	Two-tailed
t, df	t=8.263, df=4		t, df	t=16.33, df=4

## Sheet: 2C
pEGFP-C3	pEGFP-C3-YEATS2
103.491	224.688
116.459	208.728
80.0499	207.98
Results of Statistical Analysis
Column B	pEGFP-C3-YEATS2
vs.	vs.
Column A	pEGFP-C3
Unpaired t test
P value	0.0007
P value summary	***
Significantly different (P < 0.05)?	Yes
One- or two-tailed P value?	Two-tailed
t, df	t=9.509, df=4

## Sheet: 2F
shControl	shYEATS2_1	shYEATS2_2
321.5	113	284.5
402	136	175.5
315.5	172.5	146
Results of Statistical Analysis
Column B	shYEATS2_1		Column C	shYEATS2_2
vs.	vs.		vs.	vs.
Column A	shControl		Column A	shControl
Unpaired t test			Unpaired t test
P value	0.0033		P value	0.0461
P value summary	**		P value summary	*
Significantly different (P < 0.05)?	Yes		Significantly different (P < 0.05)?	Yes
One- or two-tailed P value?	Two-tailed		One- or two-tailed P value?	Two-tailed
t, df	t=6.270, df=4		t, df	t=2.857, df=4

## Sheet: 2G
pEGFP-C3	pEGFP-C3-YEATS2
335	491
360	653.5
287	653.5
Results of Statistical Analysis
Column B	pEGFP-C3-YEATS2
vs.	vs.
Column A	pEGFP-C3
Unpaired t test
P value	0.0095
P value summary	**
Significantly different (P < 0.05)?	Yes
One- or two-tailed P value?	Two-tailed
t, df	t=4.670, df=4
