# Supplementary material for: Interplay of YEATS2 and GCDH regulates histone crotonylation and drives EMT in head and neck cancer
Source: eLife. 2025 Aug 14;14:RP103321. doi: 10.7554/eLife.103321 (PMC12352869; doi:10.7554/eLife.103321)
Supplement: Figure 3—figure supplement 1—source data 3. [file elife-103321-fig3-figsupp1-data3.xlsx]

## Sheet: Supplement 1A
pGL3-Basic	YEATS2-Luc311	YEATS2-Luc508
97.275	684.427	3503.51
116.91	680.588	3049.53
85.8148	682.347	2001.9
Results of Statistical Analysis
Column B	YEATS2-Luc311		Column C	YEATS2-Luc508		Column C	YEATS2-Luc508
vs.	vs.		vs.	vs.		vs.	vs.
Column A	pGL3-Basic		Column A	pGL3-Basic		Column B	YEATS2-Luc311
Unpaired t test			Unpaired t test			Unpaired t test
P value	<0.0001		P value	0.0035		P value	0.0082
P value summary	****		P value summary	**		P value summary	**
Significantly different (P < 0.05)?	Yes		Significantly different (P < 0.05)?	Yes		Significantly different (P < 0.05)?	Yes
One- or two-tailed P value?	Two-tailed		One- or two-tailed P value?	Two-tailed		One- or two-tailed P value?	Two-tailed
t, df	t=63.68, df=4		t, df	t=6.187, df=4		t, df	t=4.879, df=4

## Sheet: Supplement 1D
shControl	shSP1_1	shSP1_2
1.02688	0.544942	0.733988
0.909494	0.413584	0.441637
1.06363	0.694395	0.648983
Results of Statistical Analysis
Column B	shSP1_1		Column C	shSP1_2
vs.	vs.		vs.	vs.
Column A	shControl		Column A	shControl
Unpaired t test			Unpaired t test
P value	0.0086		P value	0.0164
P value summary	**		P value summary	*
Significantly different (P < 0.05)?	Yes		Significantly different (P < 0.05)?	Yes
One- or two-tailed P value?	Two-tailed		One- or two-tailed P value?	Two-tailed
t, df	t=4.803, df=4		t, df	t=3.978, df=4

## Sheet: Supplement 1F
Control IP	SP1
1.16918	3.78343
1.03429	2.78577
0.796533	2.32221
Results of Statistical Analysis
Column B	SP1
vs.	vs.
Column A	Control IP
Unpaired t test
P value	0.0115
P value summary	*
Significantly different (P < 0.05)?	Yes
One- or two-tailed P value?	Two-tailed
t, df	t=4.416, df=4

## Sheet: Supplement 1G
pGL3-Basic EV	YEATS2-Luc508 WT	YEATS2-Luc508 Mut
115.531	1932.44	486.582
84.4692	1272.31	397.361
Results of Statistical Analysis
Tukey's multiple comparisons test	Mean Diff.	95.00% CI of diff.	Significant?	Summary
pGL3-Basic EV vs. YEATS2-Luc508 WT	-1502	-2640 to -364.7	Yes	*
pGL3-Basic EV vs. YEATS2-Luc508 3XMut	-342	-1480 to 795.7	No	ns
YEATS2-Luc508 WT vs. YEATS2-Luc508 3XMut	1160	22.76 to 2298	Yes	*

## Sheet: Supplement 1H
shControl	shSP1	shSP1+pEGFP-C3- YEATS2
103.184	29.9334	147.279
101.573	66.5864	138.282
95.2425	29.4891	124.787
Results of Statistical Analysis
Column B	shSP1		Column C	shSP1+pEGFP-C3- YEATS2
vs.	vs.		vs.	vs.
Column A	shControl		Column B	shSP1
Unpaired t test			Unpaired t test
P value	0.0098		P value	0.0024
P value summary	**		P value summary	**
Significantly different (P < 0.05)?	Yes		Significantly different (P < 0.05)?	Yes
One- or two-tailed P value?	Two-tailed		One- or two-tailed P value?	Two-tailed
t, df	t=4.629, df=4		t, df	t=6.808, df=4
