# Supplementary material for: Interplay of YEATS2 and GCDH regulates histone crotonylation and drives EMT in head and neck cancer
Source: eLife. 2025 Aug 14;14:RP103321. doi: 10.7554/eLife.103321 (PMC12352869; doi:10.7554/eLife.103321)
Supplement: Figure 3—source data 3. [file elife-103321-fig3-data3.xlsx]

## Sheet: 3A
pGL3-Basic	Luc311	Luc508
62.0162	1862.14	6188.49
125.738	2387.45	8114.53
112.246	1893.9	8847.51
Results of Statistical Analysis
Column C	Luc508		Column B	Luc311		Column C	Luc508
vs.	vs.		vs.	vs.		vs.	vs.
Column A	pGL3-Basic		Column A	pGL3-Basic		Column B	Luc311
Unpaired t test			Unpaired t test			Unpaired t test
P value	0.0007		P value	0.0003		P value	0.0022
P value summary	***		P value summary	***		P value summary	**
Significantly different (P < 0.05)?	Yes		Significantly different (P < 0.05)?	Yes		Significantly different (P < 0.05)?	Yes
One- or two-tailed P value?	Two-tailed		One- or two-tailed P value?	Two-tailed		One- or two-tailed P value?	Two-tailed
t, df	t=9.603, df=4		t, df	t=11.38, df=4		t, df	t=6.990, df=4

## Sheet: 3B
shControl	shSP1_1	shSP1_2
0.797875	0.334195	0.497684
1.16494	0.278908	0.432761
1.03718	0.39741	0.595858
Results of Statistical Analysis
Column B	shSP1_1		Column C	shSP1_2
vs.	vs.		vs.	vs.
Column A	shControl		Column A	shControl
Unpaired t test			Unpaired t test
P value	0.0042		P value	0.0139
P value summary	**		P value summary	*
Significantly different (P < 0.05)?	Yes		Significantly different (P < 0.05)?	Yes
One- or two-tailed P value?	Two-tailed		One- or two-tailed P value?	Two-tailed
t, df	t=5.874, df=4		t, df	t=4.178, df=4

## Sheet: 3D
Control IP	SP1
1.12612	2.7005
0.897153	2.87473
0.976728	3.46342
Results of Statistical Analysis
Column B	SP1
vs.	vs.
Column A	Control IP
Unpaired t test
P value	0.0011
P value summary	**
Significantly different (P < 0.05)?	Yes
One- or two-tailed P value?	Two-tailed
t, df	t=8.374, df=4

## Sheet: 3E
shControl	shSP1
576.928	294.085
711.426	239.549
Results of Statistical Analysis
Column B	shSP1
vs.	vs.
Column A	shControl
Unpaired t test
P value	0.035
P value summary	*
Significantly different (P < 0.05)?	Yes
One- or two-tailed P value?	Two-tailed
t, df	t=5.200, df=2

## Sheet: 3F
pGL3-Basic	Luc508 WT	Luc508 Mut
126.445	14300.6	7854.72
92.927	13004.4	9327.7
80.6278	14116.2	7838.29
Results of Statistical Analysis
Column B	Luc508 WT		Column C	Luc508 Mut
vs.	vs.		vs.	vs.
Column A	pGL3-Basic		Column A	pGL3-Basic
Unpaired t test			Unpaired t test
P value	<0.0001		P value	<0.0001
P value summary	****		P value summary	****
Significantly different (P < 0.05)?	Yes		Significantly different (P < 0.05)?	Yes
One- or two-tailed P value?	Two-tailed		One- or two-tailed P value?	Two-tailed
t, df	t=33.84, df=4		t, df	t=16.68, df=4

## Sheet: 3H
shControl	shSP1	shSP1+pEGFP-C3- YEATS2
95.5971	42.5211	65.6815
109.53	45.2955	74.3667
94.8733	56.152	99.608
Results of Statistical Analysis
Column B	shSP1		Column C	shSP1+ pEGFP-C3-YEATS2
vs.	vs.		vs.	vs.
Column A	shControl		Column B	shSP1
Unpaired t test			Unpaired t test
P value	0.0012		P value	0.044
P value summary	**		P value summary	*
Significantly different (P < 0.05)?	Yes		Significantly different (P < 0.05)?	Yes
One- or two-tailed P value?	Two-tailed		One- or two-tailed P value?	Two-tailed
t, df	t=8.219, df=4		t, df	t=2.902, df=4
