# Supplementary material for: Interplay of YEATS2 and GCDH regulates histone crotonylation and drives EMT in head and neck cancer
Source: eLife. 2025 Aug 14;14:RP103321. doi: 10.7554/eLife.103321 (PMC12352869; doi:10.7554/eLife.103321)
Supplement: Figure 4—figure supplement 4—source data 3. [file elife-103321-fig4-figsupp4-data3.xlsx]

## Sheet: Supplement 4C
pEGFP-C3	pEGFP-C3-YEATS2
1288.62	3095.89
1165.74	3243.89
2034.14	4679.19
Results of Statistical Analysis
Column B	pEGFP-C3-YEATS2
vs.	vs.
Column A	pEGFP-C3
Unpaired t test
P value	0.0191
P value summary	*
Significantly different (P < 0.05)?	Yes
One- or two-tailed P value?	Two-tailed
t, df	t=3.798, df=4
