# Supplementary material for: Interplay of YEATS2 and GCDH regulates histone crotonylation and drives EMT in head and neck cancer
Source: eLife. 2025 Aug 14;14:RP103321. doi: 10.7554/eLife.103321 (PMC12352869; doi:10.7554/eLife.103321)
Supplement: Figure 4—source data 3. [file elife-103321-fig4-data3.xlsx]

## Sheet: 4C
Normal	Tumor
1.99606	3.06769
2.70068	3.67299
1.57071	4.22237
0.811628	4.52717
0.621973	4.15858
0.541984	3.37984
0.197221	3.07079
0.281812	2.68569
0.277932	1.87414
Results of Statistical Analysis
Column B	Tumor
vs.	vs.
Column A	Normal
Unpaired t test
P value	<0.0001
P value summary	****
Significantly different (P < 0.05)?	Yes
One- or two-tailed P value?	Two-tailed
t, df	t=5.911, df=16

## Sheet: 4D
Normal	Tumor		Results of Statistical Analysis
1.00579	1.19764
0.579513	1.31843		Column B	Tumor
0.148975	2.19217		vs.	vs.
0.371109	1.07463		Column A	Normal
0.923369	1.86683
0.317391	0.553206		Unpaired t test
0.17754	0.63855		P value	<0.0001
0.916634	1.0445		P value summary	****
0.405513	0.629311		Significantly different (P < 0.05)?	Yes
0.368082	0.855478		One- or two-tailed P value?	Two-tailed
0.834437	1.59136		t, df	t=4.652, df=44
0.786216	0.900026
0.864541	1.3468
0.958995	2.19164
1.0321	1.30265
0.342408	0.353169
0.191498	0.381133
0.234328	0.933482
0.779446	1.72205
0.116728	1.09939
0.469198	1.3728
0.078763	2.37748
0.133498	0.337606

## Sheet: 4F
	Normal								Tumor
	Patient 1	Patient 2	Patient 3	Patient 4	Patient 5	Patient 6	Patient 7	Patient 8	Patient 1	Patient 2	Patient 3	Patient 4	Patient 5	Patient 6	Patient 7	Patient 8
ECHS1	0.082268	0.0772664	0.0946741	0.187729	0.0585081	0.119951	0.110419	0.178343	0.0262855	0.0384989	0.0824245	0.0578985	0.0243484	0.0502427	0.0238623	0.0505143
GCDH	0.00348318	0.00850637	0.0699704	0.0128948	0.0432254	0.0368476	0.109439	0.0468868	0.0865955	0.0647101	0.112831	0.0667947	0.169409	0.0482664	0.0977667	0.0639853
YEATS2	0.00714685	0.0917379	0.0944094	0.050566	0.0386366	0.0485615	0.0460774	0.0104647	0.112491	0.0908616	0.144638	0.0750704	0.04435	0.0366697	0.121656	0.126096
H3K27cr	0.0228864	0.111523	0.0641471	0.0567635	0.0845174	0.0255967	0.0253041	0.03609	0.101722	0.086687	0.240297	0.0826902	0.0631257	0.0691708	0.0812319	0.102983
Twist1	0.0281514	0.111865	0.0195011	0.0166656	0.0398819	0.00881911	0.0636775	0.0225562	0.0772969	0.114683	0.146813	0.0866766	0.112961	0.0235601	0.0859681	0.0768779
Results of Statistical Analysis
	Significant?	P value	Mean of N	Mean of T	Difference	SE of difference	t ratio	df
ECHS1	Yes	0.001816	0.1136	0.04426	0.06939	0.01809	3.836	14
GCDH	Yes	0.023047	0.04141	0.08879	-0.04739	0.01857	2.552	14
YEATS2	Yes	0.023795	0.04845	0.09398	-0.04553	0.01796	2.535	14
H3K27cr	Yes	0.048066	0.05335	0.1035	-0.05014	0.02315	2.166	14
Twist1	Yes	0.010588	0.03889	0.0906	-0.05171	0.01754	2.948	14

## Sheet: 4I
shControl	shYEATS2
4695.79	1182.92
2471.2	1010.84
3268.96	801.352
Results of Statistical Analysis
Column B	shYEATS2
vs.	vs.
Column A	shControl
Unpaired t test
P value	0.0198
P value summary	*
Significantly different (P < 0.05)?	Yes
One- or two-tailed P value?	Two-tailed
t, df	t=3.758, df=4

## Sheet: 4J
shControl	shGCDH
6854.08	4958.75
11262.2	3545.93
11834.5	4347.22
Results of Statistical Analysis
Column B	shGCDH
vs.	vs.
Column A	shControl
Unpaired t test
P value	0.0248
P value summary	*
Significantly different (P < 0.05)?	Yes
One- or two-tailed P value?	Two-tailed
t, df	t=3.506, df=4
