# Supplementary material for: Interplay of YEATS2 and GCDH regulates histone crotonylation and drives EMT in head and neck cancer
Source: eLife. 2025 Aug 14;14:RP103321. doi: 10.7554/eLife.103321 (PMC12352869; doi:10.7554/eLife.103321)
Supplement: Figure 5—figure supplement 1—source data 3. [file elife-103321-fig5-figsupp1-data3.xlsx]

## Sheet: Supplement 1D
shControl	shYEATS2
6.08267	1.9348
4.7028	1.82766
4.07441	1.73543
Results of Statistical Analysis
Column B	shYEATS2_1
vs.	vs.
Column A	shControl
Unpaired t test
P value	0.0064
P value summary	**
Significantly different (P < 0.05)?	Yes
One- or two-tailed P value?	Two-tailed
t, df	t=5.237, df=4

## Sheet: Supplement 1E
shControl	shYEATS2_1	shYEATS2_2
1.01829	0.426038	0.494869
1.12188	0.500464	0.507319
0.859834	0.599669	0.605682
Results of Statistical Analysis
Column B	shYEATS2_1		Column C	shYEATS2_2
vs.	vs.		vs.	vs.
Column A	shControl		Column A	shControl
Unpaired t test			Unpaired t test
P value	0.0058		P value	0.0052
P value summary	**		P value summary	**
Significantly different (P < 0.05)?	Yes		Significantly different (P < 0.05)?	Yes
One- or two-tailed P value?	Two-tailed		One- or two-tailed P value?	Two-tailed
t, df	t=5.381, df=4		t, df	t=5.533, df=4
