# Supplementary material for: Interplay of YEATS2 and GCDH regulates histone crotonylation and drives EMT in head and neck cancer
Source: eLife. 2025 Aug 14;14:RP103321. doi: 10.7554/eLife.103321 (PMC12352869; doi:10.7554/eLife.103321)
Supplement: Figure 5—source data 3. [file elife-103321-fig5-data3.xlsx]

## Sheet: 5C
shControl	shYEATS2
3.13803	1.62513
3.35118	1.2699
3.19668	1.22524
Results of Statistical Analysis
Column B	shYEATS2
vs.	vs.
Column A	shControl
Unpaired t test
P value	0.0002
P value summary	***
Significantly different (P < 0.05)?	Yes
One- or two-tailed P value?	Two-tailed
t, df	t=13.10, df=4

## Sheet: 5D
shControl	shYEATS2_1	shYEATS2_2
0.988907	0.307961	0.516677
0.858312	0.388528	0.466491
1.15278	0.494453	0.420825
Results of Statistical Analysis
Column B	shYEATS2_1		Column C	shYEATS2_2
vs.	vs.		vs.	vs.
Column A	shControl		Column A	shControl
Unpaired t test			Unpaired t test
P value	0.0039		P value	0.004
P value summary	**		P value summary	**
Significantly different (P < 0.05)?	Yes		Significantly different (P < 0.05)?	Yes
One- or two-tailed P value?	Two-tailed		One- or two-tailed P value?	Two-tailed
t, df	t=5.979, df=4		t, df	t=5.939, df=4

## Sheet: 5F
shControl	shYEATS2
4.42292	1.02456
4.75683	1.42405
5.65685	0.624165
Results of Statistical Analysis
Column B	shYEATS2
vs.	vs.
Column A	shControl
Unpaired t test
P value	0.0008
P value summary	***
Significantly different (P < 0.05)?	Yes
One- or two-tailed P value?	Two-tailed
t, df	t=9.017, df=4

## Sheet: 5J
shControl	shYEATS2	shYEATS2+ pCMV-3Tag-1A-SPARC
743	287	730.667
790.333	325	453
550	199.667	508
Results of Statistical Analysis
Column B	shYEATS2		Column C	shYEATS2+ pCMV-3Tag-1A-SPARC
vs.	vs.		vs.	vs.
Column A	shControl		Column B	shYEATS2
Unpaired t test			Unpaired t test
P value	0.0068		P value	0.034
P value summary	**		P value summary	*
Significantly different (P < 0.05)?	Yes		Significantly different (P < 0.05)?	Yes
One- or two-tailed P value?	Two-tailed		One- or two-tailed P value?	Two-tailed
t, df	t=5.148, df=4		t, df	t=3.166, df=4
