# Supplementary material for: Interplay of YEATS2 and GCDH regulates histone crotonylation and drives EMT in head and neck cancer
Source: eLife. 2025 Aug 14;14:RP103321. doi: 10.7554/eLife.103321 (PMC12352869; doi:10.7554/eLife.103321)
Supplement: Figure 6—figure supplement 1—source data 3. [file elife-103321-fig6-figsupp1-data3.xlsx]

## Sheet: Supplement 1A
shControl	shYEATS2
9.44794	5.9794
12.4235	8.19646
11.7127	7.97232
Results of Statistical Analysis
Column B	shYEATS2
vs.	vs.
Column A	shControl
Unpaired t test
P value	0.0288
P value summary	*
Significantly different (P < 0.05)?	Yes
One- or two-tailed P value?	Two-tailed
t, df	t=3.342, df=4

## Sheet: Supplement 1B
shControl	shYEATS2
41.9326	64
71.5064	71.0125
75.5835	41.9326
Results of Statistical Analysis
Column B	shYEATS2
vs.	vs.
Column A	shControl
Unpaired t test
P value	0.7843
P value summary	ns
Significantly different (P < 0.05)?	No
One- or two-tailed P value?	Two-tailed
t, df	t=0.2927, df=4

## Sheet: Supplement 1C
Untreated	2.5 mM NaCr
7.03719	11.8762
5.50217	14.3701
3.75809	17.1484
Results of Statistical Analysis
Column B	2.5 mM NaCr
vs.	vs.
Column A	Untreated
Unpaired t test
P value	0.0073
P value summary	**
Significantly different (P < 0.05)?	Yes
One- or two-tailed P value?	Two-tailed
t, df	t=5.037, df=4

## Sheet: Supplement 1D
Untreated	2.5 mM NaCr
0.725046	6.52243
0.803886	3.57066
1.47107	4.33438
Results of Statistical Analysis
Column B	2.5 mM NaCr
vs.	vs.
Column A	Untreated
Unpaired t test
P value	0.0141
P value summary	*
Significantly different (P < 0.05)?	Yes
One- or two-tailed P value?	Two-tailed
t, df	t=4.160, df=4

## Sheet: Supplement 1E
Untreated	2.5 mM NaCr
94.4526	130.965
97.7951	138.6
107.752	146.851
Results of Statistical Analysis
Column B	2.5 mM NaCr
vs.	vs.
Column A	Untreated
Unpaired t test
P value	0.0031
P value summary	**
Significantly different (P < 0.05)?	Yes
One- or two-tailed P value?	Two-tailed
t, df	t=6.380, df=4
