# Supplementary material for: Interplay of YEATS2 and GCDH regulates histone crotonylation and drives EMT in head and neck cancer
Source: eLife. 2025 Aug 14;14:RP103321. doi: 10.7554/eLife.103321 (PMC12352869; doi:10.7554/eLife.103321)
Supplement: Figure 6—source data 3. [file elife-103321-fig6-data3.xlsx]

## Sheet: 6A
shControl	shYEATS2
68.1197	21.0391
57.2816	32.8996
53.6312	24.3357
Results of Statistical Analysis
Column B	shYEATS2
vs.	vs.
Column A	shControl
Unpaired t test
P value	0.0039
P value summary	**
Significantly different (P < 0.05)?	Yes
One- or two-tailed P value?	Two-tailed
t, df	t=5.992, df=4

## Sheet: 6B
shControl	shYEATS2
2.15099	1.76541
3.4822	2.50533
Results of Statistical Analysis
Column B	shYEATS2
vs.	vs.
Column A	shControl
Unpaired t test
P value	0.4654
P value summary	ns
Significantly different (P < 0.05)?	No
One- or two-tailed P value?	Two-tailed
t, df	t=0.8946, df=2

## Sheet: 6C
shControl	shYEATS2
5.24598	1.9588
8.10361	1.78417
4.45678	1.13288
Results of Statistical Analysis
Column B	shYEATS2
vs.	vs.
Column A	shControl
Unpaired t test
P value	0.0192
P value summary	*
Significantly different (P < 0.05)?	Yes
One- or two-tailed P value?	Two-tailed
t, df	t=3.794, df=4

## Sheet: 6D
Untreated	2.5 mM NaCr
4.77334	17.9387
3.95863	15.3482
8.84585	15.1369
Results of Statistical Analysis
Column B	2.5 mM NaCr
vs.	vs.
Column A	Untreated
Unpaired t test
P value	0.0043
P value summary	**
Significantly different (P < 0.05)?	Yes
One- or two-tailed P value?	Two-tailed
t, df	t=5.843, df=4

## Sheet: 6E
Untreated	2.5 mM NaCr
0.966028	3.89416
0.832432	3.66376
1.20154	4.25927
Results of Statistical Analysis
Column B	2.5 mM NaCr
vs.	vs.
Column A	Untreated
Unpaired t test
P value	0.0001
P value summary	***
Significantly different (P < 0.05)?	Yes
One- or two-tailed P value?	Two-tailed
t, df	t=14.39, df=4

## Sheet: 6G
Untreated	2.5 mM NaCr
80.0657	265.947
90.9006	269.184
129.034	265.666
Results of Statistical Analysis
Column B	2.5 mM NaCr
vs.	vs.
Column A	Untreated
Unpaired t test
P value	0.0004
P value summary	***
Significantly different (P < 0.05)?	Yes
One- or two-tailed P value?	Two-tailed
t, df	t=11.21, df=4

## Sheet: 6H
shControl	shYEATS2	shYEATS2+2.5 mM NaCr
167.15	64.2222	48.3351
164.279	29.8571	52.3457
213.043	35.8773	70.5219
Results of Statistical Analysis
Column B	shYEATS2		Column C	shYEATS2+2.5 mM NaCr
vs.	vs.		vs.	vs.
Column A	shControl		Column B	shYEATS2
Unpaired t test			Unpaired t test
P value	0.0019		P value	0.3366
P value summary	**		P value summary	ns
Significantly different (P < 0.05)?	Yes		Significantly different (P < 0.05)?	No
One- or two-tailed P value?	Two-tailed		One- or two-tailed P value?	Two-tailed
t, df	t=7.264, df=4		t, df	t=1.091, df=4

## Sheet: 6J
shControl	shEP300
11.0125	5.24196
15.5143	6.98047
23.148	5.89122
Results of Statistical Analysis
Column B	shEP300
vs.	vs.
Column A	shControl
Unpaired t test
P value	0.0424
P value summary	*
Significantly different (P < 0.05)?	Yes
One- or two-tailed P value?	Two-tailed
t, df	t=2.940, df=4

## Sheet: 6K
shControl	shSP1	shSP1+pEGFP-C3-YEATS2
52.9361	5.04233	36.5496
46.3257	3.81797	41.4802
53.9355	2.72357	35.6069
Results of Statistical Analysis
Column B	shSP1		Column C	shSP1+pEGFP-C3- YEATS2
vs.	vs.		vs.	vs.
Column A	shControl		Column B	shSP1
Unpaired t test			Unpaired t test
P value	<0.0001		P value	<0.0001
P value summary	****		P value summary	****
Significantly different (P < 0.05)?	Yes		Significantly different (P < 0.05)?	Yes
One- or two-tailed P value?	Two-tailed		One- or two-tailed P value?	Two-tailed
t, df	t=19.04, df=4		t, df	t=17.53, df=4

## Sheet: 6L
shControl	shSP1	shSP1+pEGFP-C3-YEATS2
23.1582	9.34663	72.7655
44.0828	3.81192	48.2413
56.317	3.07375	36.444
Results of Statistical Analysis
Column B	shSP1		Column C	shSP1+pEGFP-C3- YEATS2
vs.	vs.		vs.	vs.
Column A	shControl		Column B	shSP1
Unpaired t test			Unpaired t test
P value	0.0223		P value	0.0124
P value summary	*		P value summary	*
Significantly different (P < 0.05)?	Yes		Significantly different (P < 0.05)?	Yes
One- or two-tailed P value?	Two-tailed		One- or two-tailed P value?	Two-tailed
t, df	t=3.620, df=4		t, df	t=4.327, df=4
