# Supplementary material for: Interplay of YEATS2 and GCDH regulates histone crotonylation and drives EMT in head and neck cancer
Source: eLife. 2025 Aug 14;14:RP103321. doi: 10.7554/eLife.103321 (PMC12352869; doi:10.7554/eLife.103321)
Supplement: Figure 7—figure supplement 1—source data 3. [file elife-103321-fig7-figsupp1-data3.xlsx]

## Sheet: Supplement 1A
shControl	shGCDH_1	shGCDH_2
0.990616	0.553136	0.383809
0.866298	0.29845	0.321586
1.14309	0.412039	0.340094
Results of Statistical Analysis
Column B	shGCDH_1		Column C	shGCDH_2
vs.	vs.		vs.	vs.
Column A	shControl		Column A	shControl
Unpaired t test			Unpaired t test
P value	0.006		P value	0.0014
P value summary	**		P value summary	**
Significantly different (P < 0.05)?	Yes		Significantly different (P < 0.05)?	Yes
One- or two-tailed P value?	Two-tailed		One- or two-tailed P value?	Two-tailed
t, df	t=5.321, df=4		t, df	t=7.932, df=4

## Sheet: Supplement 1E
Control IP	SP1
1.20838	22.4859
1.07945	26.0063
0.71217	11.2184
Results of Statistical Analysis
Column B	SP1
vs.	vs.
Column A	Control IP
Unpaired t test
P value	0.0133
P value summary	*
Significantly different (P < 0.05)?	Yes
One- or two-tailed P value?	Two-tailed
t, df	t=4.236, df=4

## Sheet: Supplement 1F
pCMV-3Tag-1A	pCMV-3Tag-1A-GCDH
93.4729	211.33
120.998	273.584
85.5296	193.411
Results of Statistical Analysis
Column B	pCMV-3Tag-1A-GCDH
vs.	vs.
Column A	pCMV-3Tag-1A
Unpaired t test
P value	0.009
P value summary	**
Significantly different (P < 0.05)?	Yes
One- or two-tailed P value?	Two-tailed
t, df	t=4.747, df=4
