# Supplementary material for: Interplay of YEATS2 and GCDH regulates histone crotonylation and drives EMT in head and neck cancer
Source: eLife. 2025 Aug 14;14:RP103321. doi: 10.7554/eLife.103321 (PMC12352869; doi:10.7554/eLife.103321)
Supplement: Figure 7—source data 3. [file elife-103321-fig7-data3.xlsx]

## Sheet: 7A
shControl	shGCDH_1	shGCDH_2
0.963665	0.473209	0.604586
0.956457	0.438735	0.592949
1.07988	0.573357	0.346725
Results of Statistical Analysis
Column B	shGCDH_1		Column C	shGCDH_2
vs.	vs.		vs.	vs.
Column A	shControl		Column A	shControl
Unpaired t test			Unpaired t test
P value	0.0009		P value	0.0065
P value summary	***		P value summary	**
Significantly different (P < 0.05)?	Yes		Significantly different (P < 0.05)?	Yes
One- or two-tailed P value?	Two-tailed		One- or two-tailed P value?	Two-tailed
t, df	t=8.885, df=4		t, df	t=5.212, df=4

## Sheet: 7C
shControl	shGCDH
11.4716	4.94168
9.88335	3.70635
Results of Statistical Analysis
Column B	shGCDH
vs.	vs.
Column A	shControl
Unpaired t test
P value	0.0242
P value summary	*
Significantly different (P < 0.05)?	Yes
One- or two-tailed P value?	Two-tailed
t, df	t=6.315, df=2

## Sheet: 7E
Control IP	SP1
0.842023	22.4128
1.15882	31.9937
0.999155	42.1285
Results of Statistical Analysis
Column B	SP1
vs.	vs.
Column A	Control IP
Unpaired t test
P value	0.0054
P value summary	**
Significantly different (P < 0.05)?	Yes
One- or two-tailed P value?	Two-tailed
t, df	t=5.477, df=4

## Sheet: 7F
shControl	shGCDH_1	shGCDH_2
102.977	30.4094	46.8368
95.8001	43.1685	26.2626
101.223	51.8873	35.9383
Results of Statistical Analysis
Column B	shGCDH_1		Column C	shGCDH_2
vs.	vs.		vs.	vs.
Column A	shControl		Column A	shControl
Unpaired t test			Unpaired t test
P value	0.0009		P value	0.0005
P value summary	***		P value summary	***
Significantly different (P < 0.05)?	Yes		Significantly different (P < 0.05)?	Yes
One- or two-tailed P value?	Two-tailed		One- or two-tailed P value?	Two-tailed
t, df	t=8.815, df=4		t, df	t=10.07, df=4

## Sheet: 7G
shControl	shYEATS2
3509212	718337
2178831	479336
1913283	920367
Results of Statistical Analysis
Column B	shYEATS2
vs.	vs.
Column A	shControl
Unpaired t test
P value	0.0231
P value summary	*
Significantly different (P < 0.05)?	Yes
One- or two-tailed P value?	Two-tailed
t, df	t=3.585, df=4
