# Supplementary material for: Interplay of YEATS2 and GCDH regulates histone crotonylation and drives EMT in head and neck cancer
Source: eLife. 2025 Aug 14;14:RP103321. doi: 10.7554/eLife.103321 (PMC12352869; doi:10.7554/eLife.103321)
Supplement: Supplementary file 1. [file elife-103321-supp1.xlsx]

## Sheet: Sheet1
Supplementary file 1. Results for differential gene expression analysis for 10 shortlisted epigenetic factors.
Gene	logFC	FDR	Tumor	Normal	Delta
BOP1	1.18263	5.56e-14	1846.24	864.727	2183.42
YEATS2	1.63384	1.72e-31	4568.3	1601.36	7463.89
ACTL6A	1.46826	1.29e-23	4672.81	1848.86	6860.9
ZFP57	1.38935	0.001025	45.8359	19.1136	63.682
EXOSC4	1.01276	4.5e-11	1902.72	1026.27	1927.01
CBX3	1.20676	2.17e-31	8511.79	3997.45	10271.7
C20orf20/ MRGBP	1.56045	2.5e-43	1660.08	610.045	2590.46
VRK1	1.1322	2.07e-19	1109.87	565.432	1256.59
HDGFRP3	1.05865	5.38e-12	1729.21	879.273	1830.63
RUVBL1	1.14195	1.71e-24	4335.72	2125.95	4951.18
