# Supplementary material for: Interplay of YEATS2 and GCDH regulates histone crotonylation and drives EMT in head and neck cancer
Source: eLife. 2025 Aug 14;14:RP103321. doi: 10.7554/eLife.103321 (PMC12352869; doi:10.7554/eLife.103321)
Supplement: Supplementary file 3. [file elife-103321-supp3.xlsx]

## Sheet: Sheet1
Supplementary file 3. Result of GSEA analysis showing positive correlation between YEATS2 expression and lysine degradation pathway genes in TCGA HNC samples.
NAME	SIZE	ES	NES	NOM p-val	FDR q-val	FWER p-val
KEGG_LYSINE_DEGRADATION	39	0.663532	1.66305	0.00380228	0.0731061	0.091
KEGG_PURINE_METABOLISM	154	0.509192	1.56626	0.0178926	0.148644	0.18
LYSINE_CATABOLISM	30	0.611814	1.55763	0.0162933	0.118177	0.188
PROLINE_METABOLISM	16	0.646947	1.49247	0.0670611	0.15764	0.274
GLUTAMATE_METABOLISM	16	0.662595	1.48347	0.0422265	0.140404	0.284
KEGG_ALANINE_ASPARTATE_AND_GLUTAMATE_METABOLISM	32	0.547919	1.4598	0.0542798	0.143519	0.315
KEGG_CYSTEINE_AND_METHIONINE_METABOLISM	34	0.530833	1.45676	0.0475248	0.127969	0.318
HALLMARK_CHOLESTEROL_HOMEOSTASIS	73	0.464406	1.43432	0.0550098	0.133805	0.341
PURINE_DE NOVO_BIOSYNTHESIS	30	0.506177	1.41047	0.0785124	0.147805	0.38
KEGG_VALINE_LEUCINE_AND_ISOLEUCINE_DEGRADATION	44	0.529752	1.34885	0.131631	0.199021	0.464
KEGG_PYRIMIDINE_METABOLISM	96	0.438858	1.32018	0.151697	0.217178	0.507
PYRIMIDINE_BIOSYNTHESIS_FROM_CTP	33	0.446363	1.31209	0.138947	0.21257	0.521
ASPARTATE_METABOLISM	25	0.482917	1.30578	0.139004	0.20405	0.527
KEGG_ONE_CARBON_POOL_BY_FOLATE	17	0.550537	1.29184	0.175983	0.206608	0.55
HALLMARK_FATTY_ACID_METABOLISM	156	0.380203	1.27628	0.138277	0.209985	0.571
PYRIMIDINE_BIOSYNTHESIS_FROM_UDP	33	0.459103	1.24657	0.205339	0.231047	0.608
GLYCINE_METABOLISM	24	0.476204	1.22174	0.221545	0.246799	0.645
KEGG_BETA_ALANINE_METABOLISM	22	0.491572	1.22111	0.216374	0.234563	0.645
KEGG_ARGININE_AND_PROLINE_METABOLISM	51	0.410544	1.2101	0.180328	0.232789	0.652
PURINE_SALVAGE	30	0.410185	1.18193	0.266112	0.2535	0.688
KEGG_TRYPTOPHAN_METABOLISM	39	0.415708	1.11052	0.323045	0.324479	0.748
KEGG_GLYCINE_SERINE_AND_THREONINE_METABOLISM	31	0.423469	1.07197	0.37551	0.356717	0.772
SERINE_METABOLISM	15	0.378986	0.888268	0.616205	0.612581	0.887
KEGG_PHENYLALANINE_METABOLISM	18	0.356546	0.884647	0.649123	0.593798	0.89
ARGININE_METABOLISM	22	0.329968	0.861246	0.682203	0.609009	0.9
TRYPTOPHAN_CATABOLISM	23	0.33544	0.850089	0.667343	0.607374	0.906
KEGG_HISTIDINE_METABOLISM	27	0.324061	0.820143	0.715431	0.636734	0.921
PHENYLALANINE_METABOLISM	20	0.31944	0.801888	0.742455	0.64654	0.931
