# Supplementary material for: Interplay of YEATS2 and GCDH regulates histone crotonylation and drives EMT in head and neck cancer
Source: eLife. 2025 Aug 14;14:RP103321. doi: 10.7554/eLife.103321 (PMC12352869; doi:10.7554/eLife.103321)
Supplement: Supplementary file 4. [file elife-103321-supp4.xlsx]

## Sheet: Sheet1
Supplementary file 4. List of genes having YEATS2 ChIP-seq peak in their promoters.
FAM138A
MMP23A
TNFRSF25
PLEKHG5
PRAMEF33
SPATA21
CROCC
ALDH4A1
PLA2G2C
UBXN10
CELA3A
C1QB
CNKSR1
UBXN11
CD52
SGIP1
TARS2
MIR6878
RORC
NAV1
IPO9-AS1
KLHL12
PLEKHA6
LINC00628
ZMYND11
FRMPD2B
FAM170B-AS1
FAM170B
CYP2C18
SCGB1D4
OR6T1
PLBD1
PLBD1-AS1
SMCO2
LRRC43
C13orf42
OBI1-AS1
MIR4509-1
PWRN1
SNHG14
GABRB3
MIR4509-2
CHRFAM7A
FRMD5
LYSMD2
UNC13C
SEMA7A
GOLGA6D
TBL3
NPIPB2
PKD1P3
NPIPA1
NOMO3
MIR3179-2
PKD1P1
NPIPA9
PKD1P4
SDR42E2
SULT1A2
BOLA2B
SLX1A
SLX1A-SULT1A3
NPIPB13
CLEC18C
PMFBP1
CDH13
MIR3182
KIAA0513
LINC01082
C16orf95
ABR
TRPV2
FAM106A
SRP68P2
ZNF286B
FOXO3B
ERAL1
TBC1D3
ZNF385C
C17orf113
SKAP1
MIR1203
BCAS3
SSTR2
SLC25A19
QRICH2
NPB
PCYT2
ROCK1P1
MIR8078
OSBPL1A
MIR320C2
UQCR11
CREB3L3
C3P1
CDC37
PDE4A
CCDC159
NANOS3
WIZ
TMEM221
ZNF98
ZNF529
ZNF382
SUPT5H
LIPE-AS1
PLA2G4C
CGB2
SNRNP70
ZNF613
VN1R2
TPM3P9
ZNF761
MIR516A1
MIR1283-2
NLRP12
ZSCAN5A
MTA3
FAM138B
CYP4F30P
GTDC1
ERMN
FARP2
MIR3133
SIRPB1
TGM6
SEL1L2
EPB41L1
MIR6724-1
MIR6724-2
MIR6724-4
LINC01667
DSCAM
TSPEAR
KCTD17
LINC00960
TMEM108
TMEM108-AS1
MRPS22
MED12L
P2RY14
IQCJ-SCHIP1
MIR3919
SPATA16
HTR3C
ZNF595
MAML3
SLC6A3
LINC02217
GUSBP18
UGT3A1
LINC02119
OXCT1
GHR
COMMD10
PCDHA1
PCDHGA1
PCDHGA2
PCDHGA3
PCDHGB1
PCDHGA4
PCDHGB2
PCDHGA5
PCDHGB3
PCDHGA6
PCDHGA7
PCDHGB4
PCDHGA8
PCDHGB5
PCDHGA9
PCDHGB6
PCDHGA10
PCDHGB7
PCDHGA11
CARMN
MIR145
SPARC
CLMAT3
KCNIP1
KCNMB1
KCNIP1-OT1
AACSP1
ZNRD1ASP
POLR1H
C2
LAMA4
LAMA4-AS1
CENPW
PLEKHG1
PRKAR1B
PRKAR1B-AS2
ADAP1
COX19
AP5Z1
MIR4656
RPS2P32
LINC03007
NCF1C
TRIM73
OR2AE1
TRIM4
PRKRIP1
ST7
ST7-OT4
FAM180A
SSBP1
REXO1L1P
REXO1L4P
NCALD
FAM83A
FAM83A-AS1
ATAD2
LINC02904
CCL21
FAM242F
LINC02603
PTPN3
SHOC1
ORM2
ASTN2
LAMC3
LRCH2
SNORA35B
SMIM10L2B-AS1
ETDB
GAB3
F8
F8A1
