# Supplementary material for: Interplay of YEATS2 and GCDH regulates histone crotonylation and drives EMT in head and neck cancer
Source: eLife. 2025 Aug 14;14:RP103321. doi: 10.7554/eLife.103321 (PMC12352869; doi:10.7554/eLife.103321)
Supplement: Supplementary file 5. [file elife-103321-supp5.xlsx]

## Sheet: Sheet1
Supplementary file 5. List of genes common between ChIP-seq_Lost and RNA-seq_Down groups.
Ensembl ID	Gene Symbol
ENSG00000013306	SLC25A39
ENSG00000021762	OSBPL5
ENSG00000021776	AQR
ENSG00000036672	USP2
ENSG00000050767	COL23A1
ENSG00000054793	ATP9A
ENSG00000065534	MYLK
ENSG00000065717	TLE2
ENSG00000074054	CLASP1
ENSG00000075223	SEMA3C
ENSG00000075618	FSCN1
ENSG00000076706	MCAM
ENSG00000078053	AMPH
ENSG00000081014	AP4E1
ENSG00000082781	ITGB5
ENSG00000084636	COL16A1
ENSG00000096060	FKBP5
ENSG00000096433	ITPR3
ENSG00000099308	MAST3
ENSG00000100003	SEC14L2
ENSG00000100345	MYH9
ENSG00000100364	KIAA0930
ENSG00000102271	KLHL4
ENSG00000102580	DNAJC3
ENSG00000103335	PIEZO1
ENSG00000103855	CD276
ENSG00000104361	NIPAL2
ENSG00000104415	CCN4
ENSG00000104765	BNIP3L
ENSG00000105329	TGFB1
ENSG00000105429	MEGF8
ENSG00000105953	OGDH
ENSG00000105971	CAV2
ENSG00000106003	LFNG
ENSG00000106571	GLI3
ENSG00000107798	LIPA
ENSG00000107882	SUFU
ENSG00000108175	ZMIZ1
ENSG00000108821	COL1A1
ENSG00000109906	ZBTB16
ENSG00000110218	PANX1
ENSG00000111799	COL12A1
ENSG00000112902	SEMA5A
ENSG00000113140	SPARC
ENSG00000113387	SUB1
ENSG00000113657	DPYSL3
ENSG00000113721	PDGFRB
ENSG00000116171	SCP2
ENSG00000119977	TCTN3
ENSG00000120451	SNX19
ENSG00000122870	BICC1
ENSG00000124831	LRRFIP1
ENSG00000125637	PSD4
ENSG00000128973	CLN6
ENSG00000129116	PALLD
ENSG00000129353	SLC44A2
ENSG00000130592	LSP1
ENSG00000130830	MPP1
ENSG00000131174	COX7B
ENSG00000132205	EMILIN2
ENSG00000133055	MYBPH
ENSG00000133067	LGR6
ENSG00000133816	MICAL2
ENSG00000134243	SORT1
ENSG00000134369	NAV1
ENSG00000134533	RERG
ENSG00000134668	SPOCD1
ENSG00000134824	FADS2
ENSG00000134986	NREP
ENSG00000135218	CD36
ENSG00000136205	TNS3
ENSG00000136295	TTYH3
ENSG00000136378	ADAMTS7
ENSG00000137266	SLC22A23
ENSG00000137809	ITGA11
ENSG00000138411	HECW2
ENSG00000140319	SRP14
ENSG00000140443	IGF1R
ENSG00000140575	IQGAP1
ENSG00000140807	NKD1
ENSG00000141750	STAC2
ENSG00000141753	IGFBP4
ENSG00000142156	COL6A1
ENSG00000142173	COL6A2
ENSG00000142910	TINAGL1
ENSG00000143196	DPT
ENSG00000143341	HMCN1
ENSG00000145495	MARCHF6
ENSG00000148700	ADD3
ENSG00000148848	ADAM12
ENSG00000149260	CAPN5
ENSG00000149485	FADS1
ENSG00000150093	ITGB1
ENSG00000150471	ADGRL3
ENSG00000151490	PTPRO
ENSG00000153246	PLA2R1
ENSG00000153404	PLEKHG4B
ENSG00000154518	ATP5MC3
ENSG00000154556	SORBS2
ENSG00000156113	KCNMA1
ENSG00000157500	APPL1
ENSG00000157551	KCNJ15
ENSG00000157554	ERG
ENSG00000157613	CREB3L1
ENSG00000160746	ANO10
ENSG00000161381	PLXDC1
ENSG00000162511	LAPTM5
ENSG00000163913	IFT122
ENSG00000164176	EDIL3
ENSG00000164692	COL1A2
ENSG00000164764	SBSPON
ENSG00000164929	BAALC
ENSG00000166292	TMEM100
ENSG00000166402	TUB
ENSG00000166734	GOLM2
ENSG00000166741	NNMT
ENSG00000167995	BEST1
ENSG00000168079	SCARA5
ENSG00000168874	ATOH8
ENSG00000169184	MN1
ENSG00000169696	ASPSCR1
ENSG00000170412	GPRC5C
ENSG00000171051	FPR1
ENSG00000172053	QARS1
ENSG00000172292	CERS6
ENSG00000172731	LRRC20
ENSG00000173482	PTPRM
ENSG00000180638	SLC47A2
ENSG00000181790	ADGRB1
ENSG00000182158	CREB3L2
ENSG00000182752	PAPPA
ENSG00000183098	GPC6
ENSG00000183723	CMTM4
ENSG00000185787	MORF4L1
ENSG00000185924	RTN4RL1
ENSG00000186918	ZNF395
ENSG00000187147	RNF220
ENSG00000188015	S100A3
ENSG00000196154	S100A4
ENSG00000196839	ADA
ENSG00000196872	CRACDL
ENSG00000197037	ZSCAN25
ENSG00000197635	DPP4
ENSG00000198612	COPS8
ENSG00000234616	JRK
ENSG00000249406	LINC01969
ENSG00000261801	LOXL1-AS1
