# Supplementary material for: Interplay of YEATS2 and GCDH regulates histone crotonylation and drives EMT in head and neck cancer
Source: eLife. 2025 Aug 14;14:RP103321. doi: 10.7554/eLife.103321 (PMC12352869; doi:10.7554/eLife.103321)
Supplement: Supplementary file 6. [file elife-103321-supp6.xlsx]

## Sheet: Sheet1
Supplementary file 6. Clinical characteristics of patients.
Figure 1C & 4C, Figure 1- figure supplement 1A-B
Patient No.	Age	Sex	Clinical Details	Pathological Stage
1	76	Male	Carcinoma Left RMT	pT4N2Mx
2	66	Male	Carcinoma Right FOM involves tongue	pT3N3Mx
3	41	Male	Carcinoma Left buccal mucosa	pT2N1Mx
4	51	Male	Carcinoma lower alveolus	pT4N0Mx
5	63	Male	Carcinoma Right lower GBS	pT4N2Mx
6	67	Male	Carcinoma Left buccal mucosa	pT1N0Mx
7	53	Male	Carcinoma right lateral border of tongue	pT2N0Mx
8	55	Male	Carcinoma left upper alveolus	pT4NxMx
Figure 1G & 4D, Figure 1-figure supplement 1F, Figure 4-figure supplement 1D
Patient No.	Age	Sex	Clinical Details	Pathological Stage
1	37	Male	Carcinoma Right Lateral Border of Tongue	pT3N0Mx
2	40	Male	Carcinoma Left Lateral Border of Tongue	pT3N0Mx
3	86	Female	Carcinoma Right Antero-laterl Border of Tongue	pT2N0Mx
4	61	Male	Carcinoma Left Palate	pT4N2Mx
5	53	Male	Carcinoma Right Buccal Mucosa	p3N0Mx
6	48	Male	Carcinoma Left Lateral Border of Tongue	pT3N2Mx
7	76	Male	Carcinoma Left RMT	pT4N2Mx
8	47	Male	Carcinoma Right Buccal Mucosa	pT4N0Mx
9	42	Male	Carcinoma Left Upper Alveolus with Maxillary Involvement	pT4N0Mx
10	36	Female	Carcinoma Left Posterior Buccal Mucosa	pT2N1Mx
11	41	Male	Carcinoma Tongue	pT2N0Mx
12	57	Male	Carcinoma Right Lateral Tongue	pT2N0Mx
13	87	Female	Verrucous Carcinoma Left Buccal Mucosa	pT2N0Mx
14	56	Male	Growth Left Lower GB Sulcus	pT4N2Mx
15	60	Male	Carcinoma Tongue	pT1N0Mx
16	47	Male	Verrucous Growth Lt RMT	pT1NxMX
17	36	Male	Carcinoma Left Buccal Mucosa	pT1N0Mx
18	38	Female	Carcinoma Left Posterior Buccal Mucosa	pT2N1Mx
19	27	Male	Carcinoma Right Lower GBS	pT4N0Mx
20	37	Female	Carcinoma Right Buccal Mucosa	pT2N2Mx
21	55	Male	Carcinoma Left Upper Alveolus	pT4NxMx
22	53	Male	Carcinoma Right Lateral Border of Tongue	pT2N0Mx
23	67	Male	Carcinoma Left Buccal Mucosa	pT1N0Mx
Figure 4E, Figure 4-figure supplement 2
Patient No.	Age	Sex	Clinical Details	Pathological Stage
1	42	Male	Ca Right Buccal Mucosa	pT3N0
2	39	Female	FUC of Ca left buccal mucosa, post NACT and composite resection	pT2n0
3	54	Male	Ca Left lower GBS and buccal mucosa	pT2N0
4	60	Female	FUC of Ca Tongue with second primary in Right upper alveolus	pT3
5	42	Male	Ca Lower lip and left oral commissure	pT3N0
6	42	Male	Ca Left buccal mucosa	pT4aN1
7	53	Male	Ca Lower lip	pT2N0
8	43	Male	Ca Left lower GBS	pT2N0
Figure 4-figure supplement 3
Patient No.	Age	Sex	Clinical Details	Histologic Grade
Patient 1	37	Male	Carcinoma Left lower alveolus	G1, well differentiated
Patient 2	60	Male	Carcinoma Left Buccal mucosa	G1, Well differentiated
Patient 3	41	Male	Carcinoma Left Buccal mucosa	G1, Well- differentiated
Patient 4	47	Male	Carcinoma Vallecula-Post CT/RT.	G1, Well differentiated
Patient 5	43	Male	Carcinoma Left buccal mucosa	G1, Well differentiated
Patient 6	33	Male	Carcinoma Left lower GBS	G2, Moderately differentiated
Patient 7	60	Male	Carcinoma Left lateral border of tongue	G2, Moderately differentiated
Patient 8	62	Male	Carcinoma Upper alveolus/palate	G1, Well differentiated
Patient 9	37	Male	Carcinoma Left lateral border of tongue	G1, Well differentiated
Patient 10	33	Male	Carcinoma Left lateral border of tongue with oropharyngeal involvement	G2, Moderately differentiated
